# Supplementary material for: Sp–sp3 C–C bond formation via Fe(OTf)3/TfOH cocatalyzed coupling reaction of terminal alkynes with benzylic alcohols
Source: Royal Society of Chemistry journal article supplement (doi:10.1039/b911905a), 2009-01-01

# Sp-sp<sup>3</sup> C-C Bond Formation via Fe(OTf)<sub>3</sub>/TfOH Cocatalyzed Coupling Reaction of Terminal Alkynes with Benzylic Alcohols

Shi-Kai Xiang,<sup>a</sup> Li-He Zhang,<sup>a</sup> Ning Jiao<sup>\*a,b</sup>

<sup>a</sup> State Key Laboratory of Natural and Biomimetic Drugs, School of Pharmaceutical Sciences, Peking University, Xue Yuan Rd. 38, Beijing 100191, China,

<sup>b</sup> State Key Laboratory of Organometallic Chemistry, Chinese Academy of Sciences, Shanghai 200032, China

E-mail: jiaoning@bjmu.edu.cn

Fax: (+86)10-82805297

## Table of contents

|                                                          |    |
|----------------------------------------------------------|----|
| General remarks                                          | S2 |
| Screening with different catalysts                       | S2 |
| Mechanistic study                                        | S3 |
| Experimental procedures and characterization of products | S3 |
| NMR spectra of compounds                                 | S7 |

## General Remarks.

**General:** All reactions were carried out under N<sub>2</sub> atmosphere. <sup>1</sup>H-NMR spectra were recorded on a JEOL AL-300 or Bruker AVIII-400 spectrometers. Chemical shifts (in ppm) were referenced to tetramethylsilane ( $\delta = 0$  ppm) in CDCl<sub>3</sub> as an internal standard. <sup>13</sup>C-NMR spectra were obtained by the same NMR spectrometers and were calibrated with CDCl<sub>3</sub> ( $\delta = 77.00$  ppm). Mass spectra were recorded by PE SCLEX QSTAR spectrometer. Unless otherwise noted, materials obtained from commercial suppliers were used without further purification. DCE, DMF, MeNO<sub>2</sub> were freshly distilled over CaH<sub>2</sub>. Fe(OTf)<sub>3</sub> was synthesized according to literature method.<sup>1</sup> **1b**, **1c**, **1g**, **1h** are known compounds and prepared from the corresponding substituted ketons<sup>2</sup> by reduction with NaBH<sub>4</sub> in MeOH at room temperature. **2g**<sup>3</sup> were prepared according to literature methods. Most of products **3** are not stable in air.

## Screening with different catalysts:

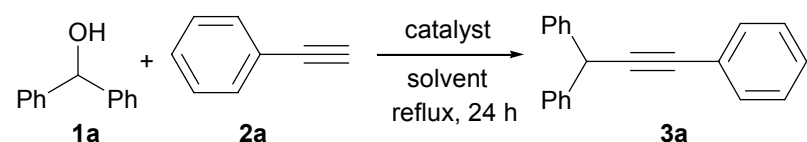

| entry | catalyst (%)             | solvent | yield of <b>3aa</b> (%) <sup>b</sup> |
|-------|--------------------------|---------|--------------------------------------|
| 1     | In(OTf) <sub>3</sub> (5) | DCE     | 51                                   |
| 2     | AgOTf (5)                | DCE     | 53                                   |
| 3     | Sc(OTf) <sub>3</sub> (5) | DCE     | 18                                   |
| 4     | Cu(OTf) <sub>2</sub> (5) | DCE     | 57                                   |
| 5     | Yb(OTf) <sub>3</sub> (5) | DCE     | 26                                   |

## Mechanistic study

The triflate substrate can convert into the expected product as reported by Marcuzzi et. al.<sup>4</sup> However, when the reaction of **1a** was carried out in the absence of alkyne, the triflate intermediate **B** was not obtained. Therefore, we consider that the reactions are more likely to occur through cationic intermediates as we described in the text. These discussions have been added in SI.

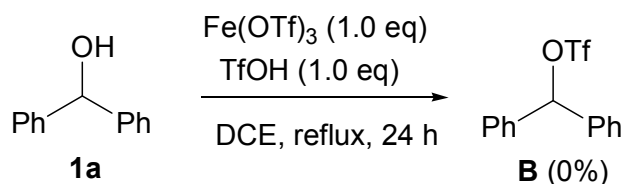

## Experimental Section

### 1,3,3-Triphenyl-1-propyne (**3aa**)<sup>5</sup>

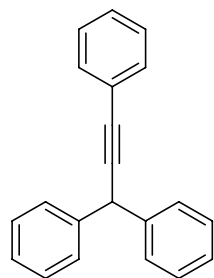

**Typical procedure:** TfOH (0.05 mmol, 25  $\mu\text{L}$  (2 M in DMF)) was added to a solution of  $\text{Fe}(\text{OTf})_3$  (11.7 mg, 0.023 mmol), benzhydrol **1a** (90.8 mg, 0.49 mmol), DCE (2.0 mL), phenylacetylene **2a** (83  $\mu\text{L}$ , 0.75 mmol) in a dry Schlenck tube under  $\text{N}_2$ . The reaction mixture was refluxed for 24 h. The solution was cooled to room temperature and evaporated under vacuum. The crude product was purified by column chromatography on silica gel (eluent: petroleum ether / dichloromethane = 40:1) to afford 101.2 mg (77%) of **3aa**: white solid; IR:(KBr)  $\nu_{\text{max}}$  1949, 1596, 1489, 756, 697, 559  $\text{cm}^{-1}$ ;  $^1\text{H}$  NMR (300 MHz,  $\text{CDCl}_3$ ):  $\delta$  7.47-7.43 (m, 6 H), 7.35-7.20 (m, 9 H), 5.21 (s, 1 H);  $^{13}\text{C}$  NMR (75 MHz,  $\text{CDCl}_3$ ):  $\delta$  141.8, 131.8, 128.7, 128.3, 128.0, 127.0, 123.5, 90.2, 84.9, 43.7; MS (70 eV):  $m/z$  (%): 268.2 (100)  $[\text{M}]^+$ .

### 1-Phenyl-3-phenyl-3-(2-methylphenyl)-1-propyne (**3ba**)<sup>5</sup>

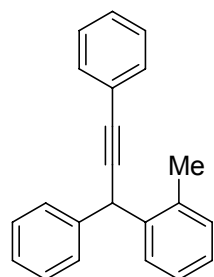

The reaction of **1b** (93.1 mg, 0.47 mmol), **2a** (83  $\mu\text{L}$ , 0.75 mmol),  $\text{Fe}(\text{OTf})_3$  (11.7 mg, 0.023 mmol), TfOH (0.05 mmol, 25  $\mu\text{L}$  (2 M in DMF)) in DCE (2.0 mL) under  $\text{N}_2$  afforded 113.9 mg (86%) of **3ba**: Light yellow liquid; IR:(KBr)  $\nu_{\text{max}}$  1949, 1599, 1490, 1450, 1030, 755, 694  $\text{cm}^{-1}$ ;  $^1\text{H}$  NMR (400 MHz,  $\text{CDCl}_3$ ):  $\delta$  7.52-7.16 (m, 14 H), 5.38 (s, 1 H), 2.33 (s, 3 H);  $^{13}\text{C}$  NMR (100 MHz,  $\text{CDCl}_3$ ):  $\delta$  140.8, 139.4, 136.0, 131.7, 130.7, 128.8, 128.5, 128.2, 128.0, 127.9, 127.1, 126.7, 126.3, 123.6, 90.2, 84.6, 40.8, 19.7; MS (70 eV):  $m/z$  (%): 282.3 (82)  $[\text{M}]^+$ , 191.2 (100).

### 1-Phenyl-3-phenyl-3-(3-methylphenyl)-1-propyne (3ca)

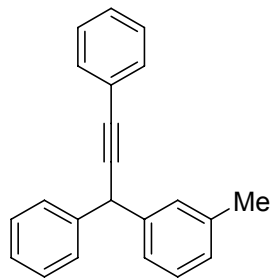

The reaction of **1c** (93.8 mg, 0.47 mmol), **2a** (83  $\mu$ L, 0.75 mmol), Fe(OTf)<sub>3</sub> (12.2 mg, 0.024 mmol), TfOH (0.05 mmol, 25  $\mu$ L (2 M in DMF)) in DCE (2.0 mL) under N<sub>2</sub> afforded 82.7 mg (62%) of **3ca**: Light yellow liquid; IR:(KBr)  $\nu_{\max}$  1949, 1490, 1448, 756, 695 cm<sup>-1</sup>; <sup>1</sup>H NMR (400 MHz, CDCl<sub>3</sub>):  $\delta$  7.49-7.43 (m, 4 H), 7.34-7.28 (m, 5 H), 7.24-7.05 (m, 4 H), 7.04 (d,  $J$  = 7.2 Hz, 1 H), 5.17 (s, 1 H), 2.33 (s, 3 H); <sup>13</sup>C NMR (100 MHz, CDCl<sub>3</sub>):  $\delta$  141.9, 141.7, 138.3, 131.7, 128.63, 128.58, 128.5, 128.2, 127.92, 127.89, 127.7, 126.8, 125.0, 123.6, 90.4, 84.8, 43.7, 21.5; MS (70 eV):  $m/z$  (%): 282.3 (100) [M]<sup>+</sup>; HRMS  $m/z$  (ESI): Calcd. for C<sub>22</sub>H<sub>19</sub> (M+H<sup>+</sup>) 283.1481, Found: 283.1478.

### 1-Phenyl-3-phenyl-3-(4-methylphenyl)-1-propyne (3da)

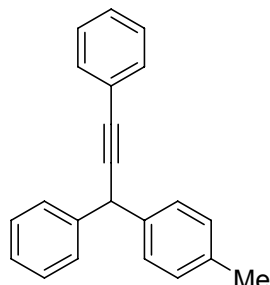

The reaction of **1d** (98.0 mg, 0.49 mmol), **2a** (83  $\mu$ L, 0.75 mmol), Fe(OTf)<sub>3</sub> (12.7 mg, 0.025 mmol), TfOH (0.05 mmol, 25  $\mu$ L (2 M in DMF)) in DCE (2.0 mL) under N<sub>2</sub> afforded 101.0 mg (72%) of **3da**: Light yellow liquid; IR:(KBr)  $\nu_{\max}$  1949, 1898, 1658, 1599, 1510, 1491, 1450, 756, 729, 694 cm<sup>-1</sup>; <sup>1</sup>H NMR (400 MHz, CDCl<sub>3</sub>):  $\delta$  7.46-7.41 (m, 4 H), 7.33-7.19 (m, 8 H), 7.11 (d,  $J$  = 7.6 Hz, 2 H), 5.16 (s, 1 H), 2.29 (s, 3 H); <sup>13</sup>C NMR (100 MHz, CDCl<sub>3</sub>):  $\delta$  142.0, 138.8, 136.5, 131.7, 129.3, 128.6, 128.2, 127.9, 127.83, 127.77, 126.8, 123.6, 90.4, 84.7, 43.4, 21.0; MS (70 eV):  $m/z$  (%): 282.3 (100) [M]<sup>+</sup>; HRMS  $m/z$  (ESI): Calcd. for C<sub>22</sub>H<sub>19</sub> (M+H<sup>+</sup>) 283.1481, Found: 283.1482.

### 1-Phenyl-3-phenyl-3-(4-methoxyphenyl)-1-propyne (3ea)<sup>6</sup>

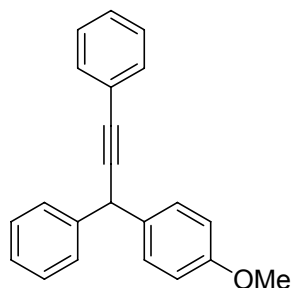

The reaction of **1e** (105.9 mg, 0.49 mmol), **2a** (83  $\mu$ L, 0.75 mmol), Fe(OTf)<sub>3</sub> (11.0 mg, 0.022 mmol), TfOH (0.05 mmol, 25  $\mu$ L (2 M in DMF)) in DCE (2.0 mL) under N<sub>2</sub> afforded 79.4 mg (54%) of **3ea**: Light yellow liquid; IR:(KBr)  $\nu_{\max}$  1952, 1884, 1607, 1509, 1491, 1453, 1250, 1177, 1034, 757, 695 cm<sup>-1</sup>; <sup>1</sup>H NMR (400 MHz, CDCl<sub>3</sub>):  $\delta$  7.47-7.40 (m, 4 H), 7.35-7.20 (m, 9 H), 6.84 (d,  $J$  = 8.40, 2 H), 5.15 (s, 1 H), 3.74 (s, 3 H); <sup>13</sup>C NMR (100 MHz, CDCl<sub>3</sub>):  $\delta$  158.5, 142.1, 133.9, 131.7, 128.9, 128.6, 128.2, 127.9, 127.8, 126.8, 123.5, 114.0, 90.5, 84.7, 55.2, 42.9; MS (70 eV):  $m/z$  (%): 298.3 (100) [M]<sup>+</sup>.

### 1-Phenyl-3-phenyl-3-(4-chlorophenyl)-1-propyne (3fa)<sup>5</sup>

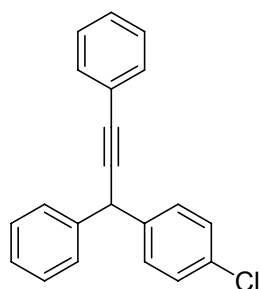

The reaction of **1f** (106.5 mg, 0.49 mmol), **2a** (83  $\mu$ L, 0.75 mmol), Fe(OTf)<sub>3</sub> (12.9 mg, 0.026 mmol), TfOH (0.05 mmol, 25  $\mu$ L (2 M in DMF)) in DCE (2.0 mL) under N<sub>2</sub> afforded 98.0 mg (66%) of **3fa**: Light yellow liquid; IR:(KBr)  $\nu_{\max}$  1949, 1897, 1598, 1489, 1091, 755, 694 cm<sup>-1</sup>; <sup>1</sup>H NMR (400 MHz, CDCl<sub>3</sub>):  $\delta$  7.48-7.23 (m, 14 H), 5.17 (s, 1 H); <sup>13</sup>C NMR (100 MHz,

CDCl<sub>3</sub>):  $\delta$  141.3, 140.3, 132.8, 131.7, 129.3, 128.7, 128.3, 128.1, 127.8, 127.1, 123.3, 89.6, 85.3, 43.1; MS (70 eV):  $m/z$  (%): 302.2 (40) [M]<sup>+</sup>, 267.2 (100).

### 1-Phenyl-3-phenyl-3-(4-phenylphenyl)-1-propyne (**3ga**)<sup>7</sup>

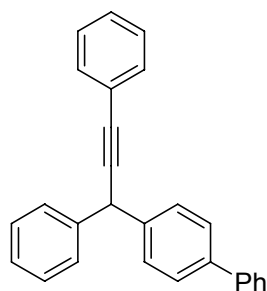

The reaction of **1g** (120.5 mg, 0.46 mmol), **2a** (83  $\mu$ L, 0.75 mmol), Fe(OTf)<sub>3</sub> (12.5 mg, 0.025 mmol), TfOH (0.05 mmol, 25  $\mu$ L (2 M in DMF)) in DCE (2.0 mL) under N<sub>2</sub> afforded 122.4 mg (77%) of **3ga**: white solid; IR:(KBr)  $\nu_{\max}$  1949, 1597, 1488, 758, 696, 480 cm<sup>-1</sup>; <sup>1</sup>H NMR (300 MHz, CDCl<sub>3</sub>):  $\delta$  7.58-7.21 (m, 19 H), 5.25 (s, 1 H); <sup>13</sup>C NMR (75 MHz, CDCl<sub>3</sub>):  $\delta$  141.7, 140.92, 140.87, 140.0, 131.8, 128.82, 128.77, 128.4, 128.3, 128.1, 128.0, 127.5, 127.3, 127.14, 127.06, 123.5, 90.1, 85.0, 43.4;

MS (70 eV):  $m/z$  (%): 344.3 (100) [M]<sup>+</sup>.

### 1-Phenyl-3-phenyl-3-(4-tert-butylphenyl)-1-propyne (**3ha**)

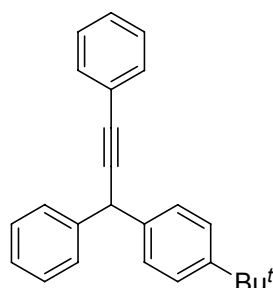

The reaction of **1h** (111.4 mg, 0.46 mmol), **2a** (83  $\mu$ L, 0.75 mmol), Fe(OTf)<sub>3</sub> (12.4 mg, 0.025 mmol), TfOH (0.05 mmol, 25  $\mu$ L (2 M in DMF)) in DCE (2.0 mL) under N<sub>2</sub> afforded 107.7 mg (72%) of **3ha**: Light yellow liquid; IR:(KBr)  $\nu_{\max}$  1948, 1599, 1509, 1491, 756, 697 cm<sup>-1</sup>; <sup>1</sup>H NMR (300 MHz, CDCl<sub>3</sub>):  $\delta$  7.50-7.44 (m, 4 H), 7.39-7.22 (m, 10 H), 5.19 (s, 1 H), 1.29 (s, 9 H); <sup>13</sup>C NMR (75 MHz, CDCl<sub>3</sub>):  $\delta$  149.8, 142.0, 138.8, 131.8, 128.7, 128.3, 128.0, 127.5, 126.9, 125.6, 123.6, 90.5,

84.6, 43.2, 34.3, 31.3; MS (70 eV):  $m/z$  (%): 324.3 (57) [M]<sup>+</sup>; 309.2 (100); HRMS  $m/z$  (ESI): Calcd. for C<sub>25</sub>H<sub>25</sub> (M+H<sup>+</sup>) 325.1951, Found: 325.1955.

### 1-(4-Methylphenyl)-3,3-diphenyl-1-propyne (**3ab**)<sup>5</sup>

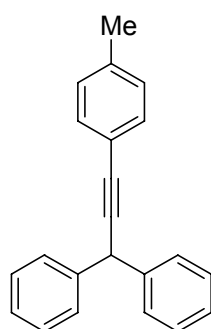

The reaction of **1a** (91.9 mg, 0.50 mmol), **2b** (95  $\mu$ L, 0.75 mmol), Fe(OTf)<sub>3</sub> (12.5 mg, 0.025 mmol), TfOH (0.05 mmol, 25  $\mu$ L (2 M in DMF)) in DCE (2.0 mL) under N<sub>2</sub> afforded 78.9 mg (56%) of **3ab**: white solid; IR:(KBr)  $\nu_{\max}$  1953, 1597, 1505, 1491, 1450, 814, 740, 700, 529 cm<sup>-1</sup>; <sup>1</sup>H NMR (400 MHz, CDCl<sub>3</sub>):  $\delta$  7.45-7.41 (m, 4 H), 7.36 (d,  $J$  = 8.4 Hz, 2 H), 7.32-7.28 (m, 4 H), 7.23-7.18 (m, 2 H), 7.08 (d,  $J$  = 8.0 Hz, 2H), 5.19 (s, 1 H), 2.32 (s, 3 H); <sup>13</sup>C NMR (100 MHz, CDCl<sub>3</sub>):  $\delta$  141.9, 138.0, 131.5, 129.0, 128.6, 127.9, 126.8, 120.4, 89.4, 85.0, 43.8, 21.4; MS (70 eV):  $m/z$  (%): 282.2 (100)

[M]<sup>+</sup>.

### 1-(2-Methylphenyl)-3,3-diphenyl-1-propyne (**3ac**)

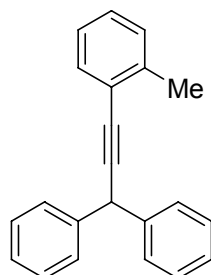

The reaction of **1a** (91.0 mg, 0.49 mmol), **2c** (95  $\mu$ L, 0.75 mmol), Fe(OTf)<sub>3</sub> (12.2 mg, 0.024 mmol), TfOH (0.05 mmol, 25  $\mu$ L (2 M in DMF)) in DCE (2.0 mL) under N<sub>2</sub> afforded 113.4 mg (81%) of **3ac**: white solid; IR:(KBr)  $\nu_{\max}$  1954, 1596, 1489, 1453, 759, 697 cm<sup>-1</sup>; <sup>1</sup>H NMR (400 MHz, CDCl<sub>3</sub>):  $\delta$  7.46-7.42 (M, 5 H), 7.32-7.28 (m, 4 H), 7.23-7.16 (m, 4 H), 7.13-7.07 (m, 1 H), 5.24 (s, 1 H), 2.44 (s,

3H);  $^{13}\text{C}$  NMR (100 MHz,  $\text{CDCl}_3$ ):  $\delta$  141.9, 140.2, 132.0, 129.4, 128.6, 128.0, 127.9, 126.8, 125.5, 123.3, 94.2, 83.9, 44.0, 20.9; MS (70 eV):  $m/z$  (%): 282.3 (18)  $[\text{M}]^+$ , 191 (100); HRMS  $m/z$  (ESI): Calcd. for  $\text{C}_{22}\text{H}_{19}$  ( $\text{M}+\text{H}^+$ ) 283.1481, Found: 283.1491.

### 1-(3-Methylphenyl)-3,3-diphenyl-1-propyne (3ad)

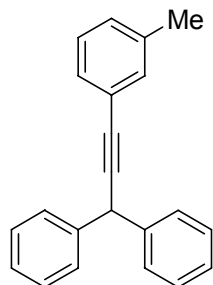

The reaction of **1a** (91.0 mg, 0.49 mmol), **2d** (95  $\mu\text{L}$ , 0.75 mmol),  $\text{Fe}(\text{OTf})_3$  (12.5 mg, 0.025 mmol), TfOH (0.05 mmol, 25  $\mu\text{L}$  (2 M in DMF)) in DCE (2.0 mL) under  $\text{N}_2$  afforded 104.5 mg (75%) of **3ad**: white solid; IR:(KBr)  $\nu_{\text{max}}$  1973, 1599, 1579, 1491, 1451, 757, 697  $\text{cm}^{-1}$ ;  $^1\text{H}$  NMR (400 MHz,  $\text{CDCl}_3$ ):  $\delta$  7.44-7.41 (m, 4 H), 7.31-7.26 (m, 6 H), 7.22-7.13 (m, 3 H), 7.07 (d,  $J = 7.6$  Hz, 1 H), 5.18 (s, 1 H), 2.28 (s, 3 H);  $^{13}\text{C}$  NMR (100 MHz,  $\text{CDCl}_3$ ):  $\delta$  141.8, 137.8, 132.3, 128.8, 128.7, 128.6, 128.1, 127.9, 126.8, 123.3, 89.8, 85.0, 43.7, 21.1; MS (70 eV):  $m/z$  (%): 282.2 (100)  $[\text{M}]^+$ ; HRMS  $m/z$  (ESI): Calcd. for  $\text{C}_{22}\text{H}_{19}$  ( $\text{M}+\text{H}^+$ ) 283.1481, Found: 283.1479.

### 1-(4-Bromophenyl)-3,3-diphenyl-1-propyne (3ae)

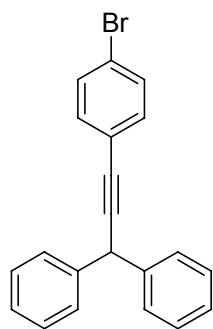

The reaction of **1a** (90.5 mg, 0.49 mmol), **2e** (129.3 mg, 0.71 mmol),  $\text{Fe}(\text{OTf})_3$  (12.4 mg, 0.025 mmol), TfOH (0.05 mmol, 25  $\mu\text{L}$  (2 M in DMF)) in DCE (2.0 mL) under  $\text{N}_2$  afforded 134.9 mg (79%) of **3ae**: white solid; IR:(KBr)  $\nu_{\text{max}}$  1953, 1597, 1581, 1484, 1450, 1070, 1010, 821, 733, 699  $\text{cm}^{-1}$ ;  $^1\text{H}$  NMR (400 MHz,  $\text{CDCl}_3$ ):  $\delta$  7.42-7.37 (m, 6 H), 7.32-7.27 (m, 6 H), 7.23-7.19 (m, 2 H), 5.17 (s, 1 H);  $^{13}\text{C}$  NMR (100 MHz,  $\text{CDCl}_3$ ):  $\delta$  141.4, 133.1, 131.4, 128.6, 127.8, 127.0, 122.4, 122.1, 91.5, 83.8, 43.7; MS (70 eV):  $m/z$  (%): 346.1 (73)  $[\text{M}-1]^+$ , 348.1 (74)  $[\text{M}+1]^+$ , 189.0 (100); HRMS  $m/z$  (ESI): Calcd. for  $\text{C}_{21}\text{H}_{16}\text{Br}$  ( $\text{M}+\text{H}^+$ ) 347.0430, Found: 347.0440.

### 1-(4-Fluorophenyl)-3,3-diphenyl-1-propyne (3af)

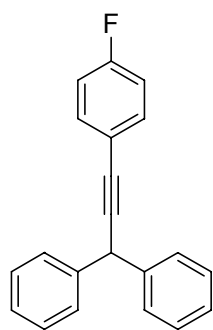

The reaction of **1a** (90.7 mg, 0.49 mmol), **2f** (90  $\mu\text{L}$ , 0.75 mmol),  $\text{Fe}(\text{OTf})_3$  (12.7 mg, 0.025 mmol), TfOH (0.05 mmol, 25  $\mu\text{L}$  (2 M in DMF)) in DCE (2.0 mL) under  $\text{N}_2$  afforded 112.1 mg (80%) of **3af**: Light yellow liquid; IR:(KBr)  $\nu_{\text{max}}$  1949, 1890, 1600, 1506, 1494, 1452, 1231 836, 739, 699, 530  $\text{cm}^{-1}$ ;  $^1\text{H}$  NMR (400 MHz,  $\text{CDCl}_3$ ):  $\delta$  7.46-7.40 (m, 6 H), 7.31 (t,  $J = 7.6$  Hz, 4 H), 7.22 (t,  $J = 6.4$  Hz, 2 H), 6.97 (t,  $J = 8.8$  Hz, 2 H), 5.19 (s, 1 H);  $^{13}\text{C}$  NMR (100 MHz,  $\text{CDCl}_3$ ):  $\delta$  162.3 (d,  $J = 247.0$  Hz), 141.6, 133.5 (d,  $J = 8.0$  Hz), 128.6, 127.9, 126.9, 119.5 (d,  $J = 4.0$  Hz), 115.4 (d,  $J = 22.0$  Hz), 89.9, 83.8, 43.7; MS (70 eV):  $m/z$  (%): 286.2 (100)  $[\text{M}]^+$ ; HRMS (ESI): Calcd. for  $\text{C}_{21}\text{H}_{16}\text{F}$  ( $\text{M}+\text{H}^+$ ) 287.1231, Found: 287.1230.

### 1-(4-Phenylphenyl)-3,3-diphenyl-1-propyne (**3ag**)

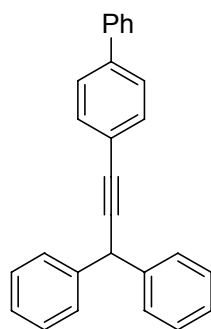

The reaction of **1a** (90.3 mg, 0.49 mmol), **2g** (129.6 mg, 0.73 mmol), Fe(OTf)<sub>3</sub> (12.3 mg, 0.024 mmol), TfOH (0.05 mmol, 25 μL (2 M in DMF)) in DCE (2.0 mL) under N<sub>2</sub> afforded 107.1 mg (63%) of **3ag**: white solid; IR:(KBr)  $\nu_{\max}$  1949, 1598, 1488, 1450, 764, 697 cm<sup>-1</sup>; <sup>1</sup>H NMR (300 MHz, CDCl<sub>3</sub>):  $\delta$  7.60-7.21 (m, 19 H), 5.24 (s, 1 H); <sup>13</sup>C NMR (75 MHz, CDCl<sub>3</sub>):  $\delta$  141.8, 140.8, 140.5, 132.2, 128.9, 128.7, 128.0, 127.6, 127.1, 127.0, 122.5, 90.9, 84.7, 43.7; MS (70 eV): m/z (%): 344.3 (100) [M]<sup>+</sup>; HRMS (ESI): Calcd. for C<sub>27</sub>H<sub>21</sub> (M+H<sup>+</sup>) 345.1638, Found: 345.1642.

### Reference:

1. J. S. Haynes, J. R. Sams, R. C. Thompson, *Can. J. Chem.*, 1981, **59**, 669.
2. M. Haddach, J. R. McCarthy, *Tetrahedron Lett.*, 1999, **40**, 3109.
3. A. Yokoyama, T. Maruyama, K. Tagami, H. Masu, K. Katagiri, I. Azumaya, T. Yokozawa, *Org. Lett.*, 2008, **10**, 3207.
4. F. Marcuzzi, G. Modena, and G. Melloni in *J. Org. Chem.*, 1982, **47**, 4577.
5. G. W. Kabalka, M. -L. Yao, S. Borella, *Org. Lett.*, 2006, **8**, 879.
6. Z. -P. Zhan, J. -L. Yu, H. -J. Liu, Y. -Y. Cui, R. -F. Yang, W. -Z. Yang, J. -P. Li, *J. Org. Chem.*, 2006, **71**, 8298.
7. T. L. Jacobs, D. Dankner, S. Singer, *Tetrahedron*, 1964, **20**, 2177.

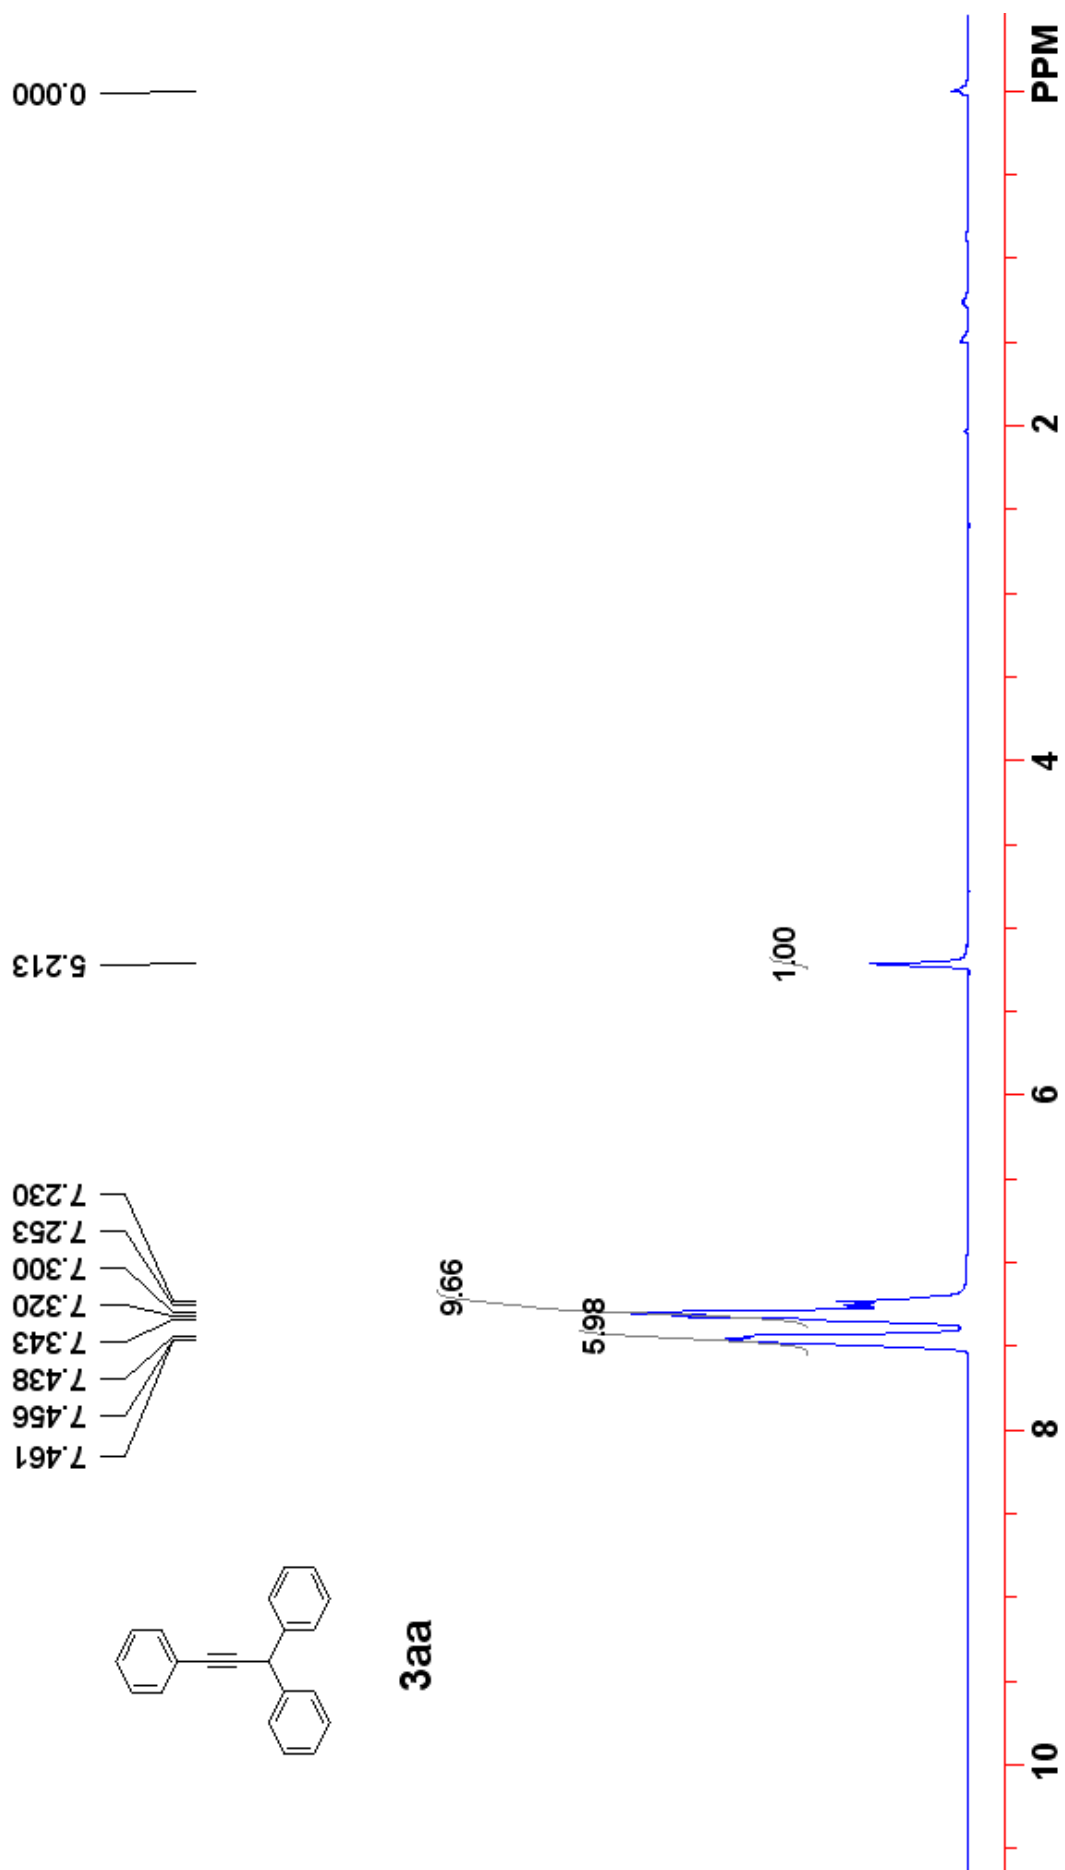



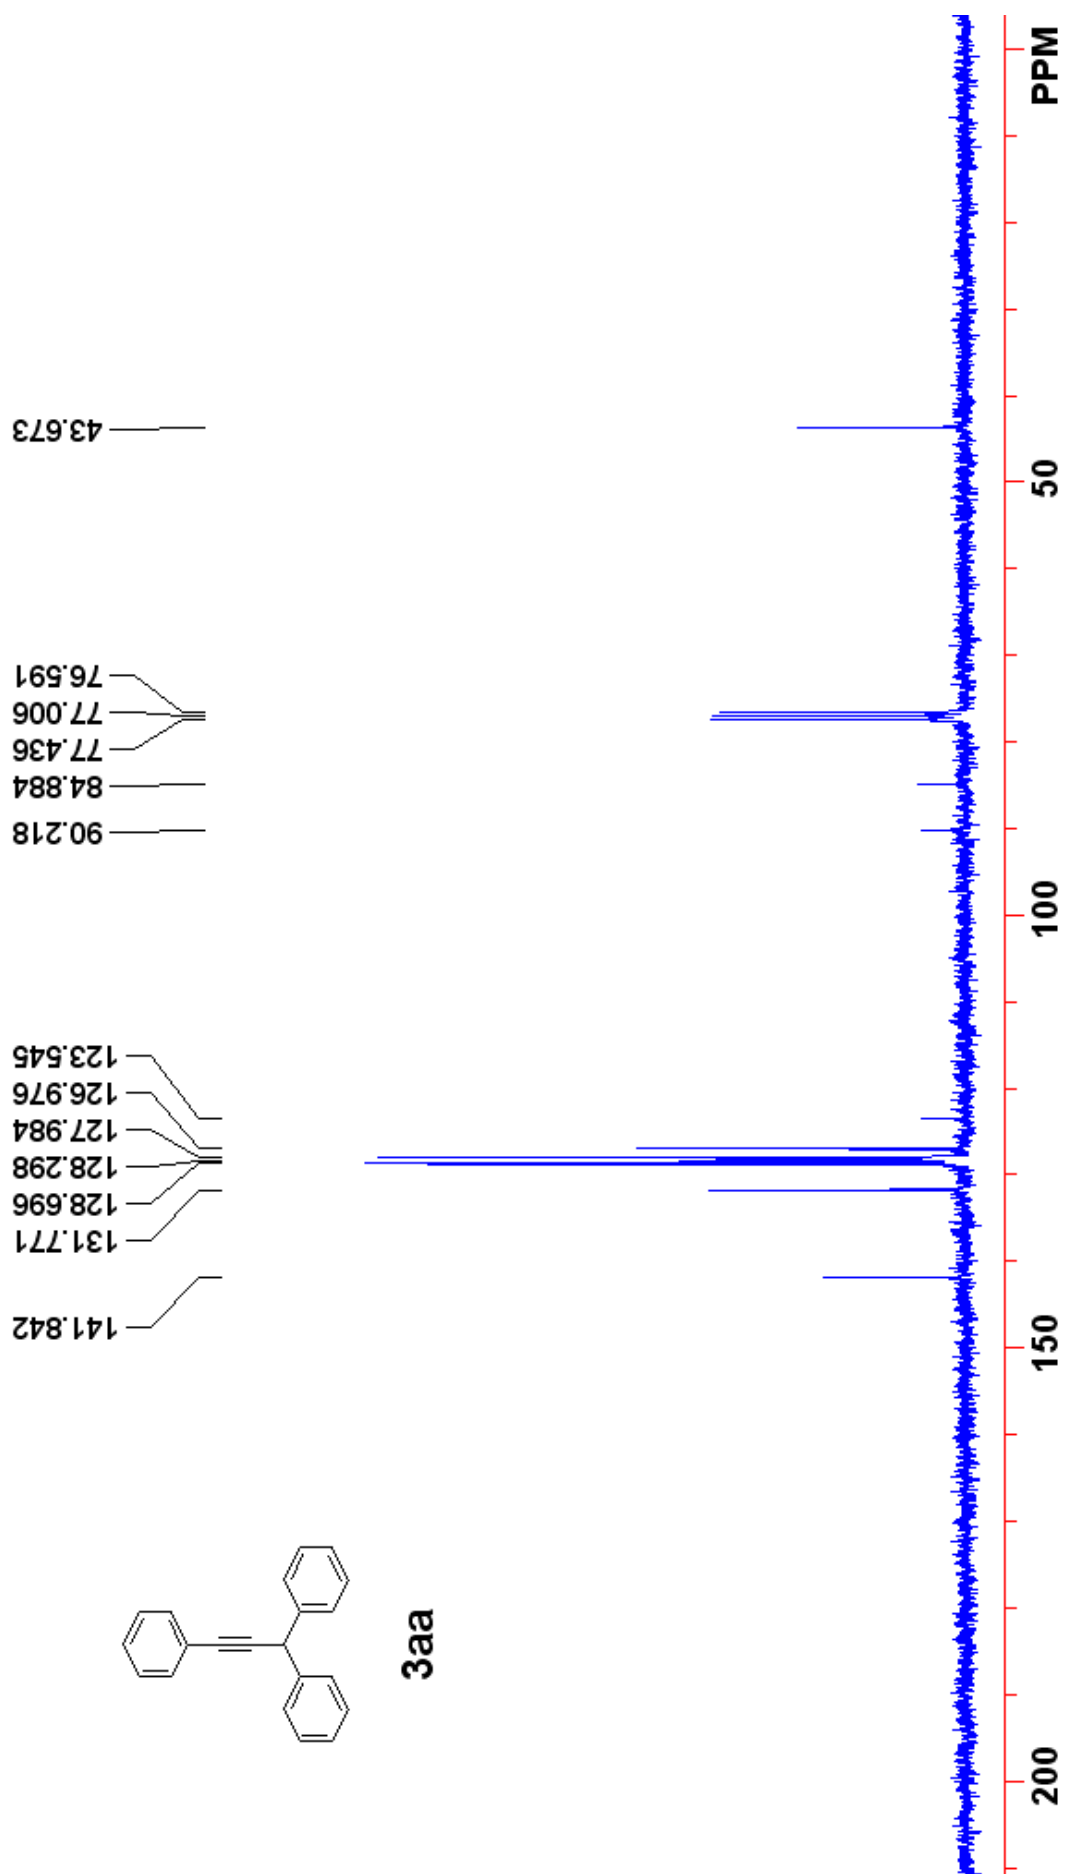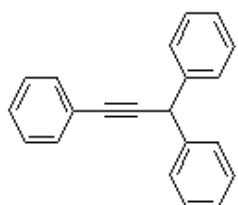

3aa

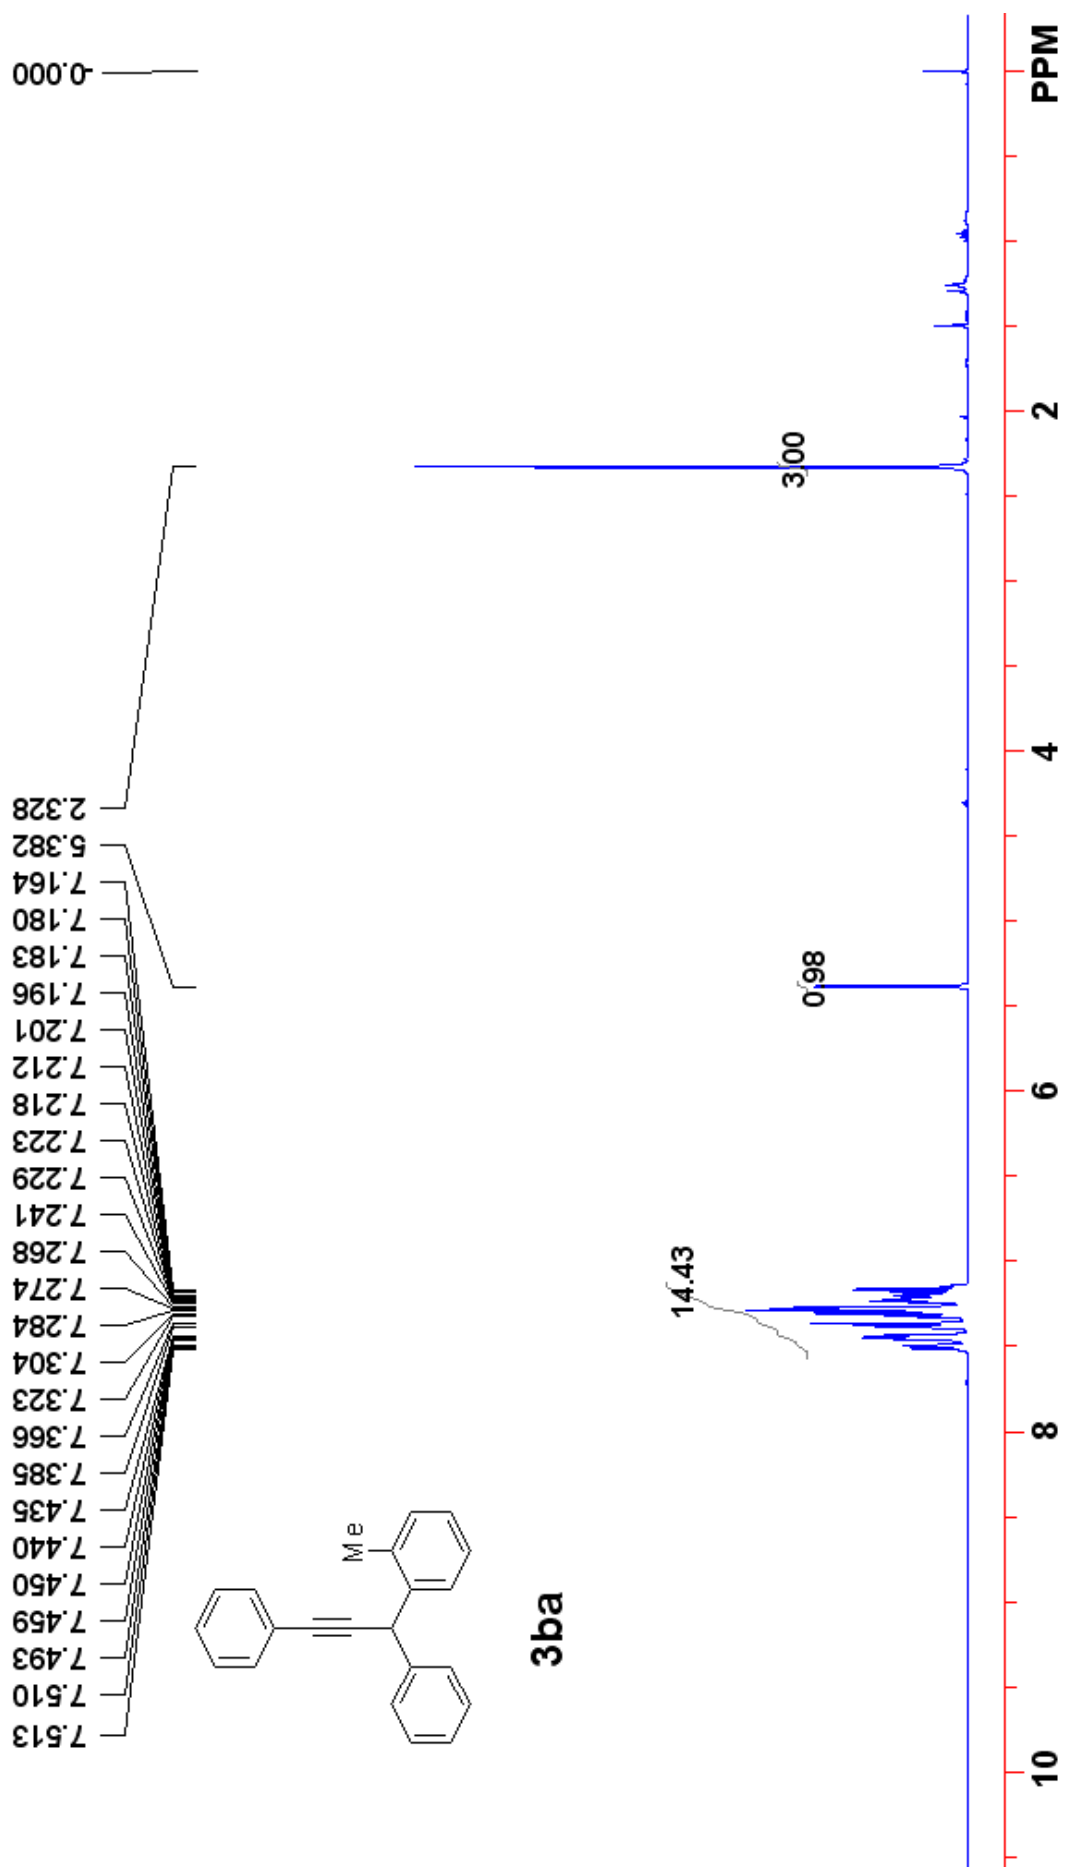

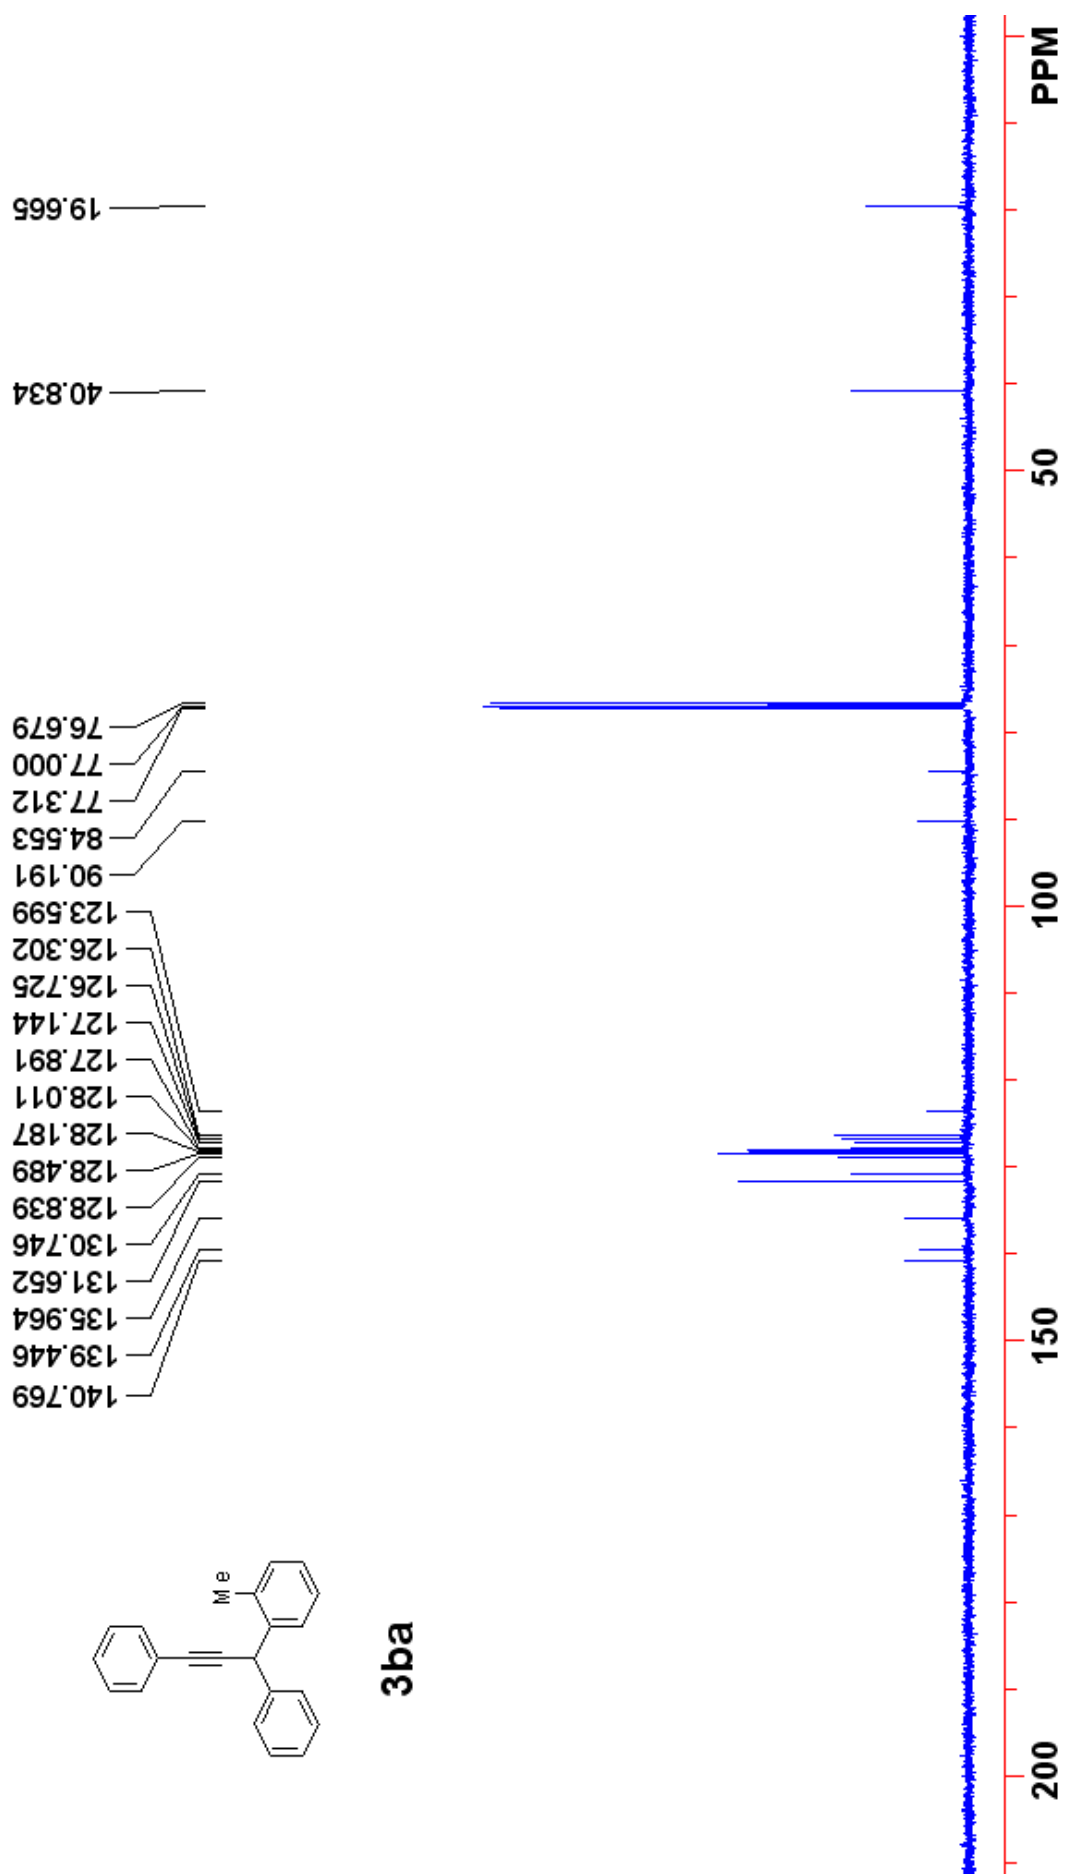

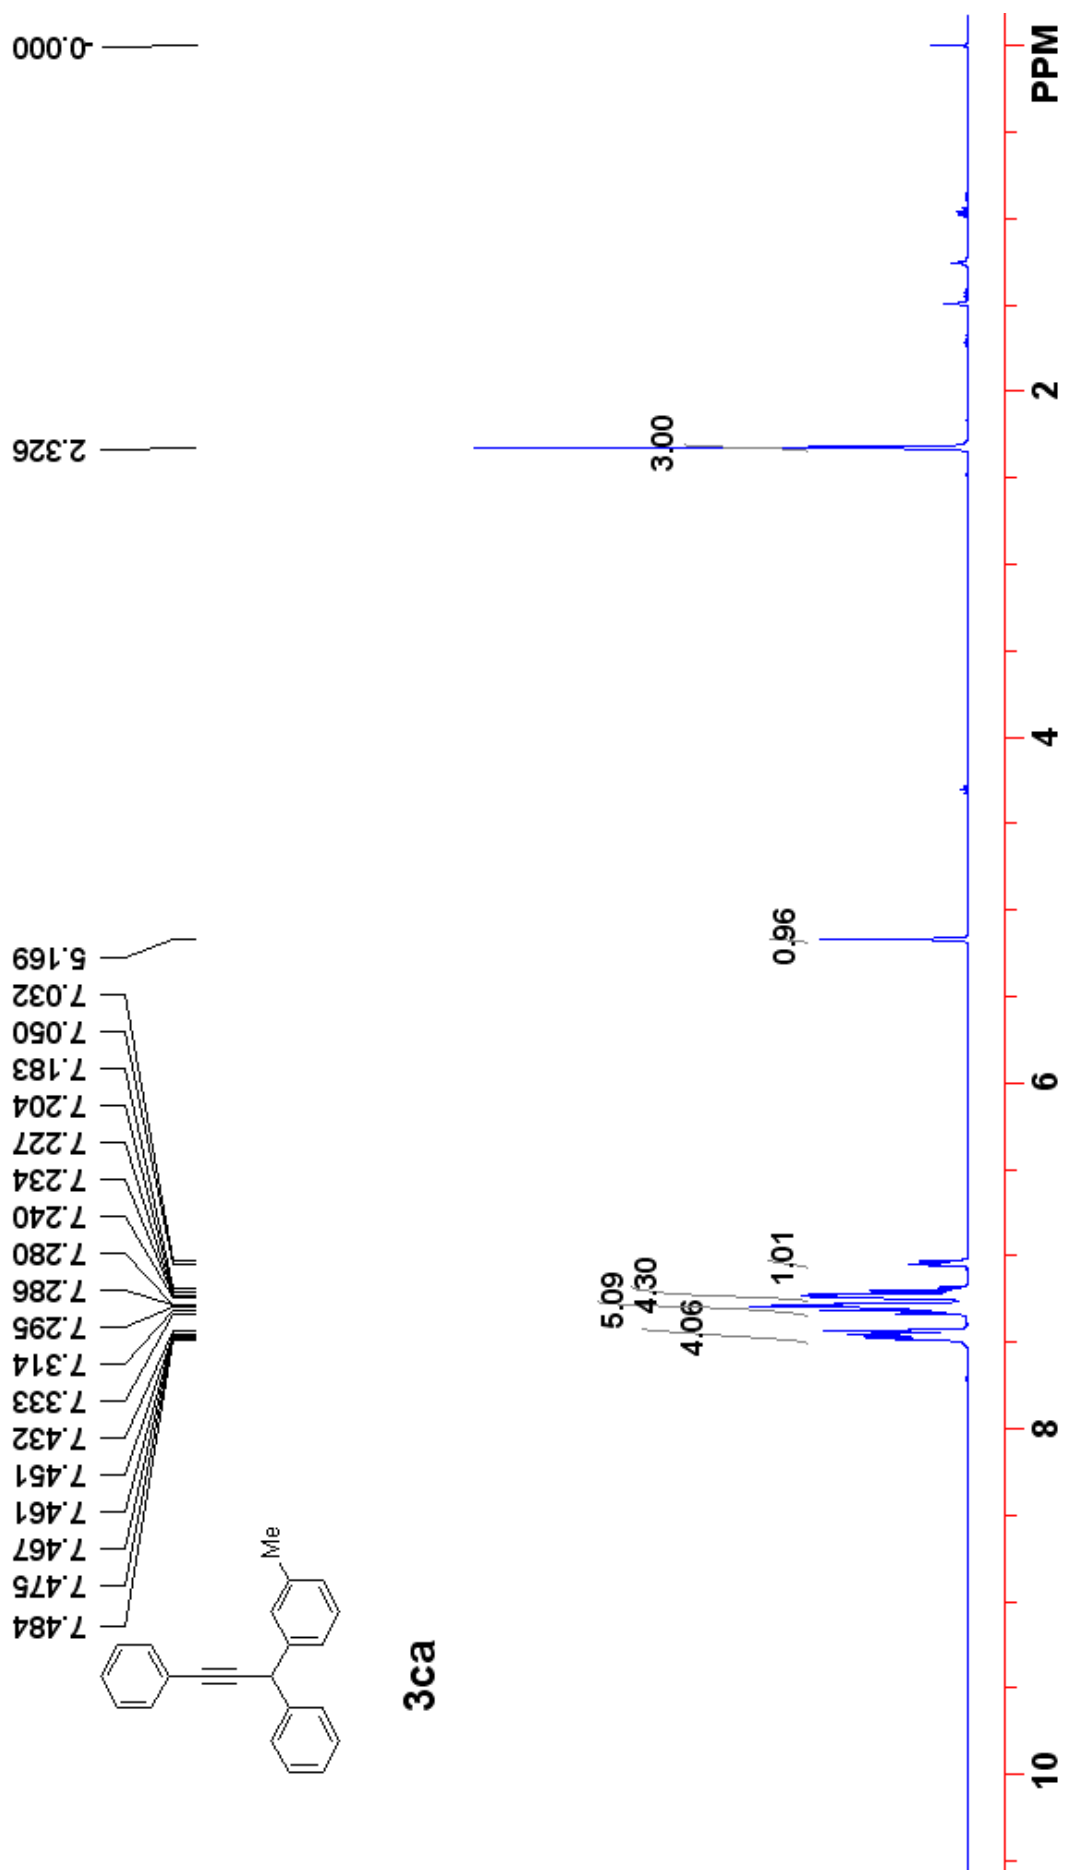

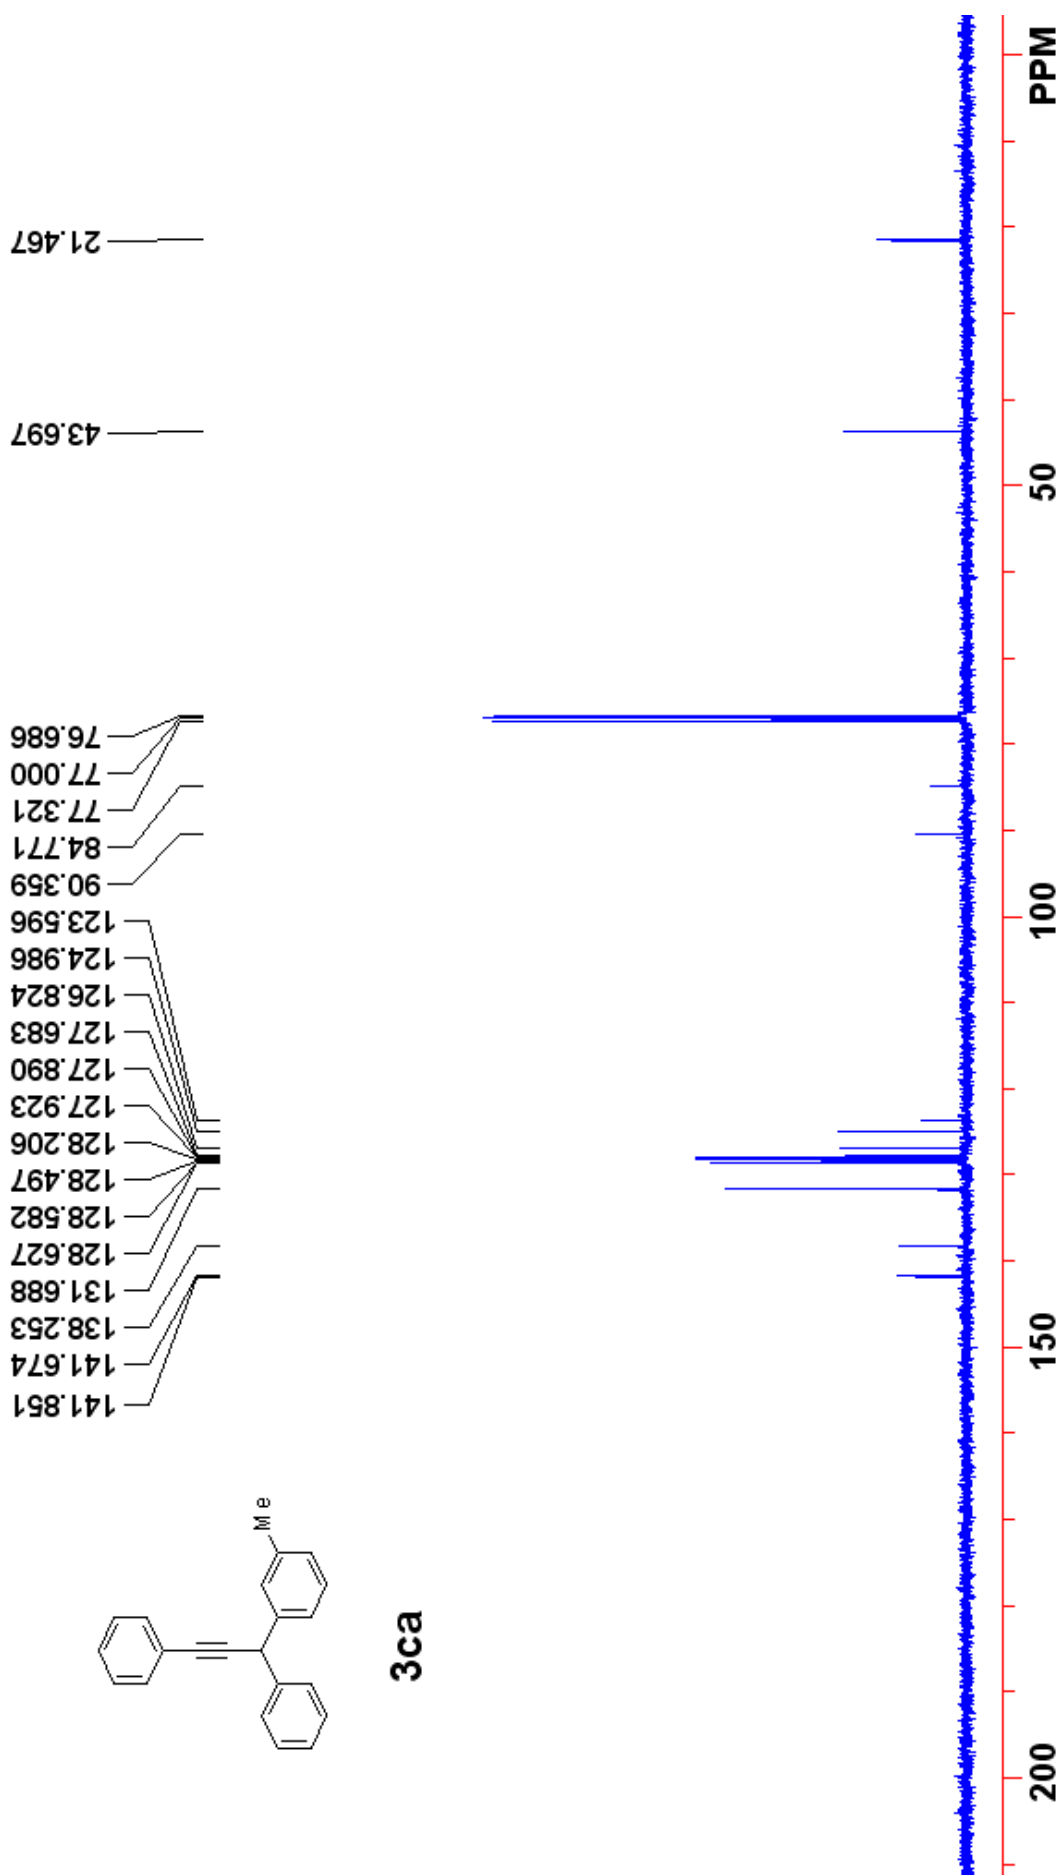

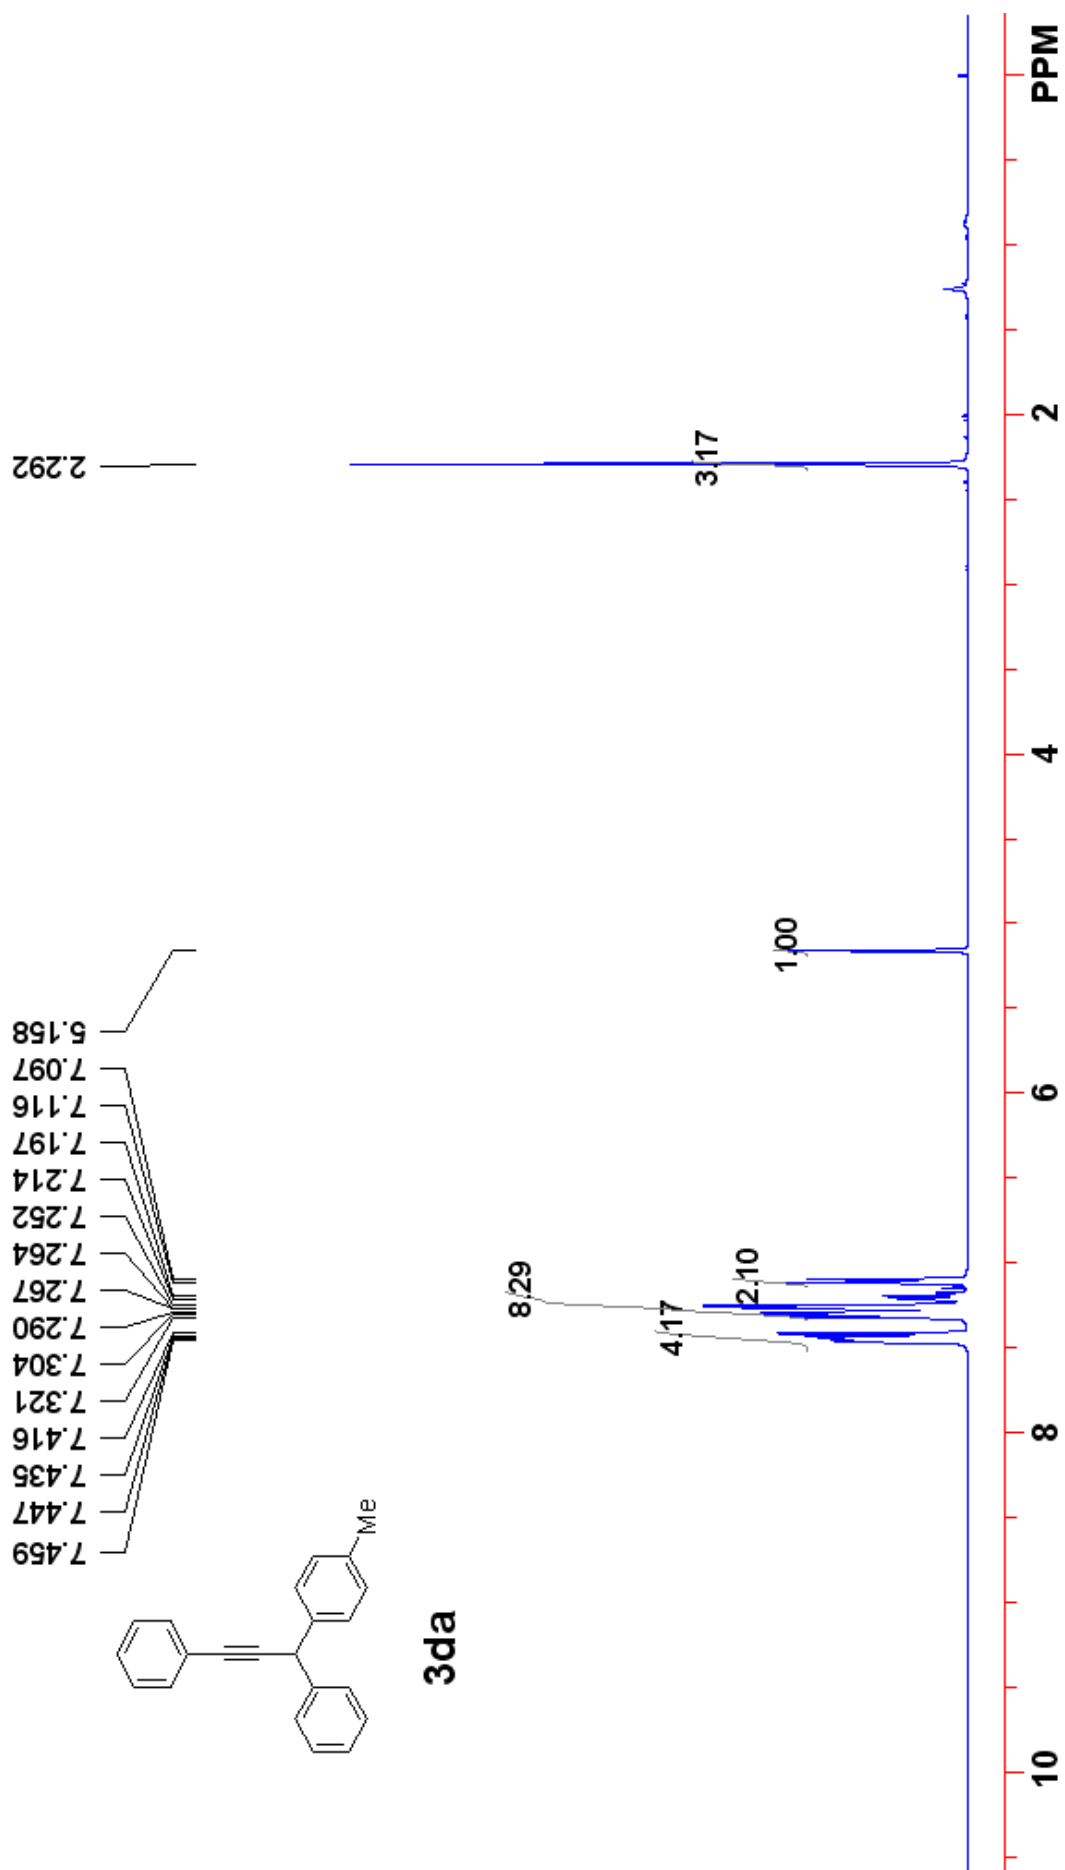

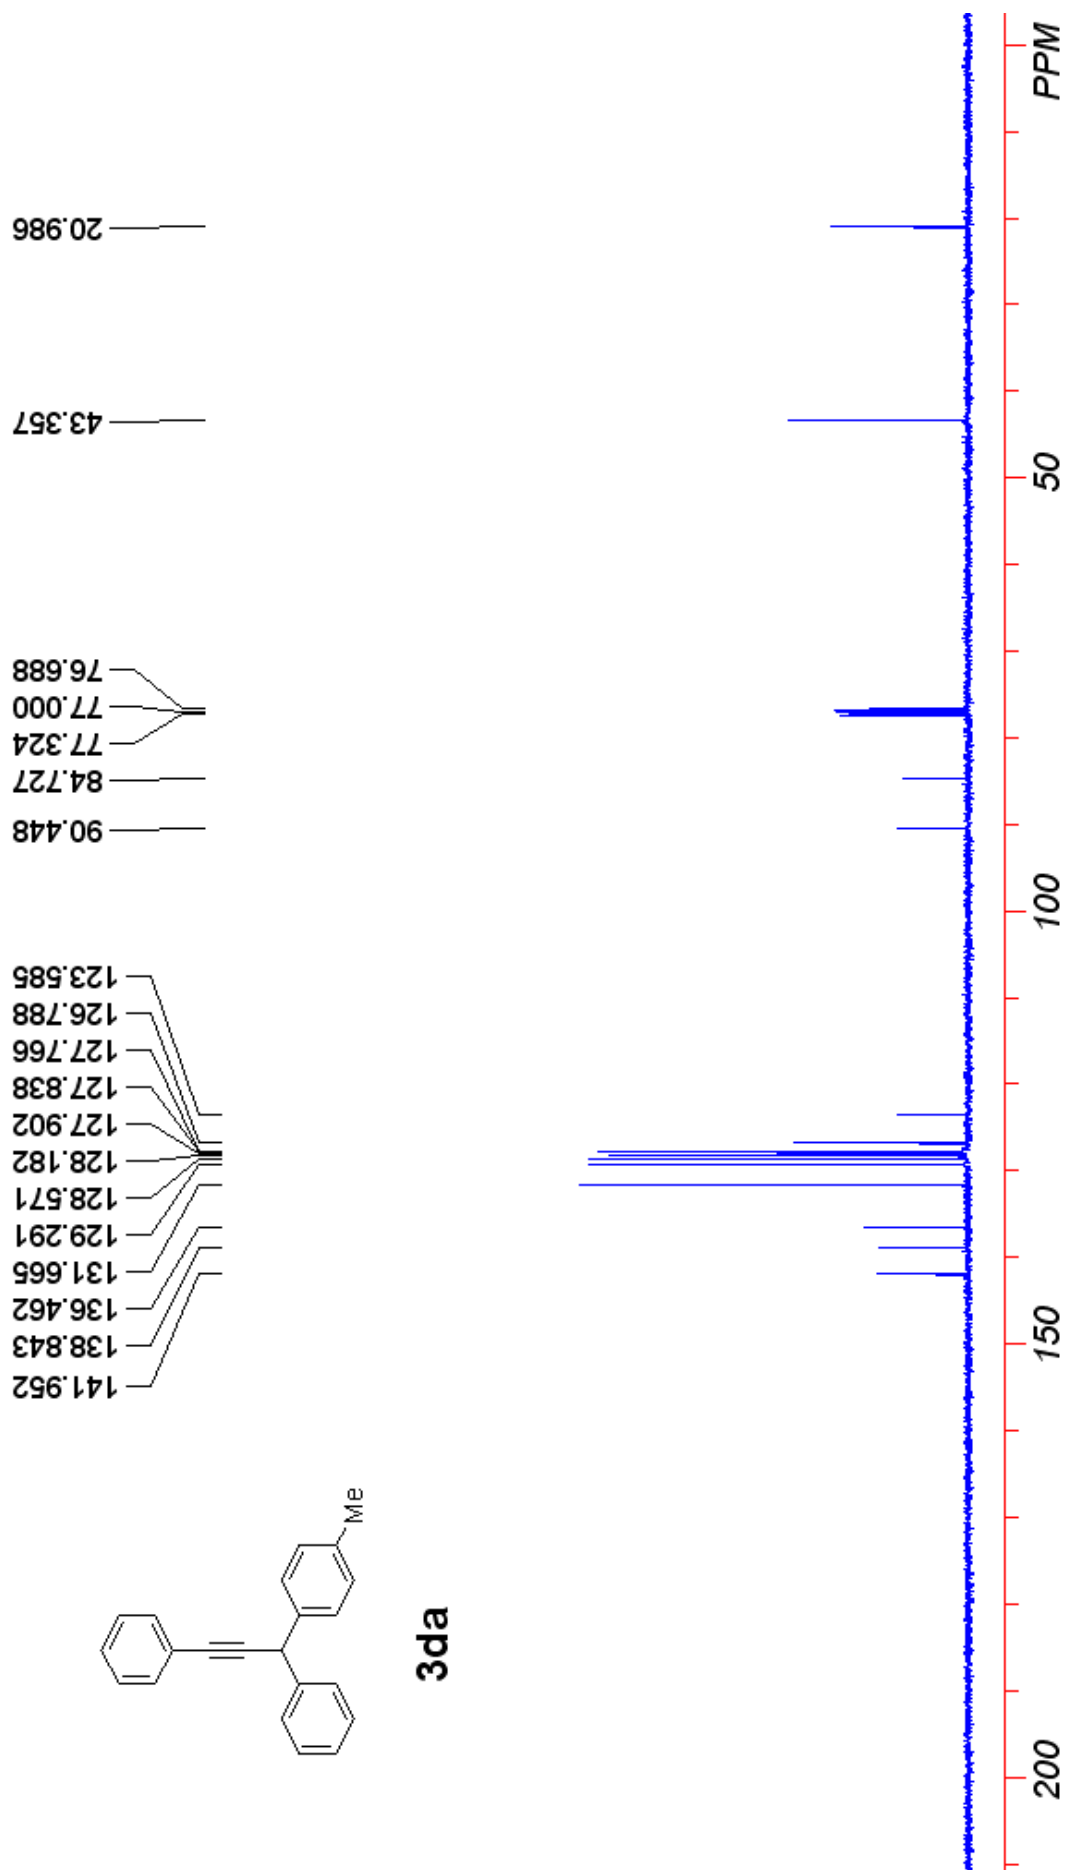

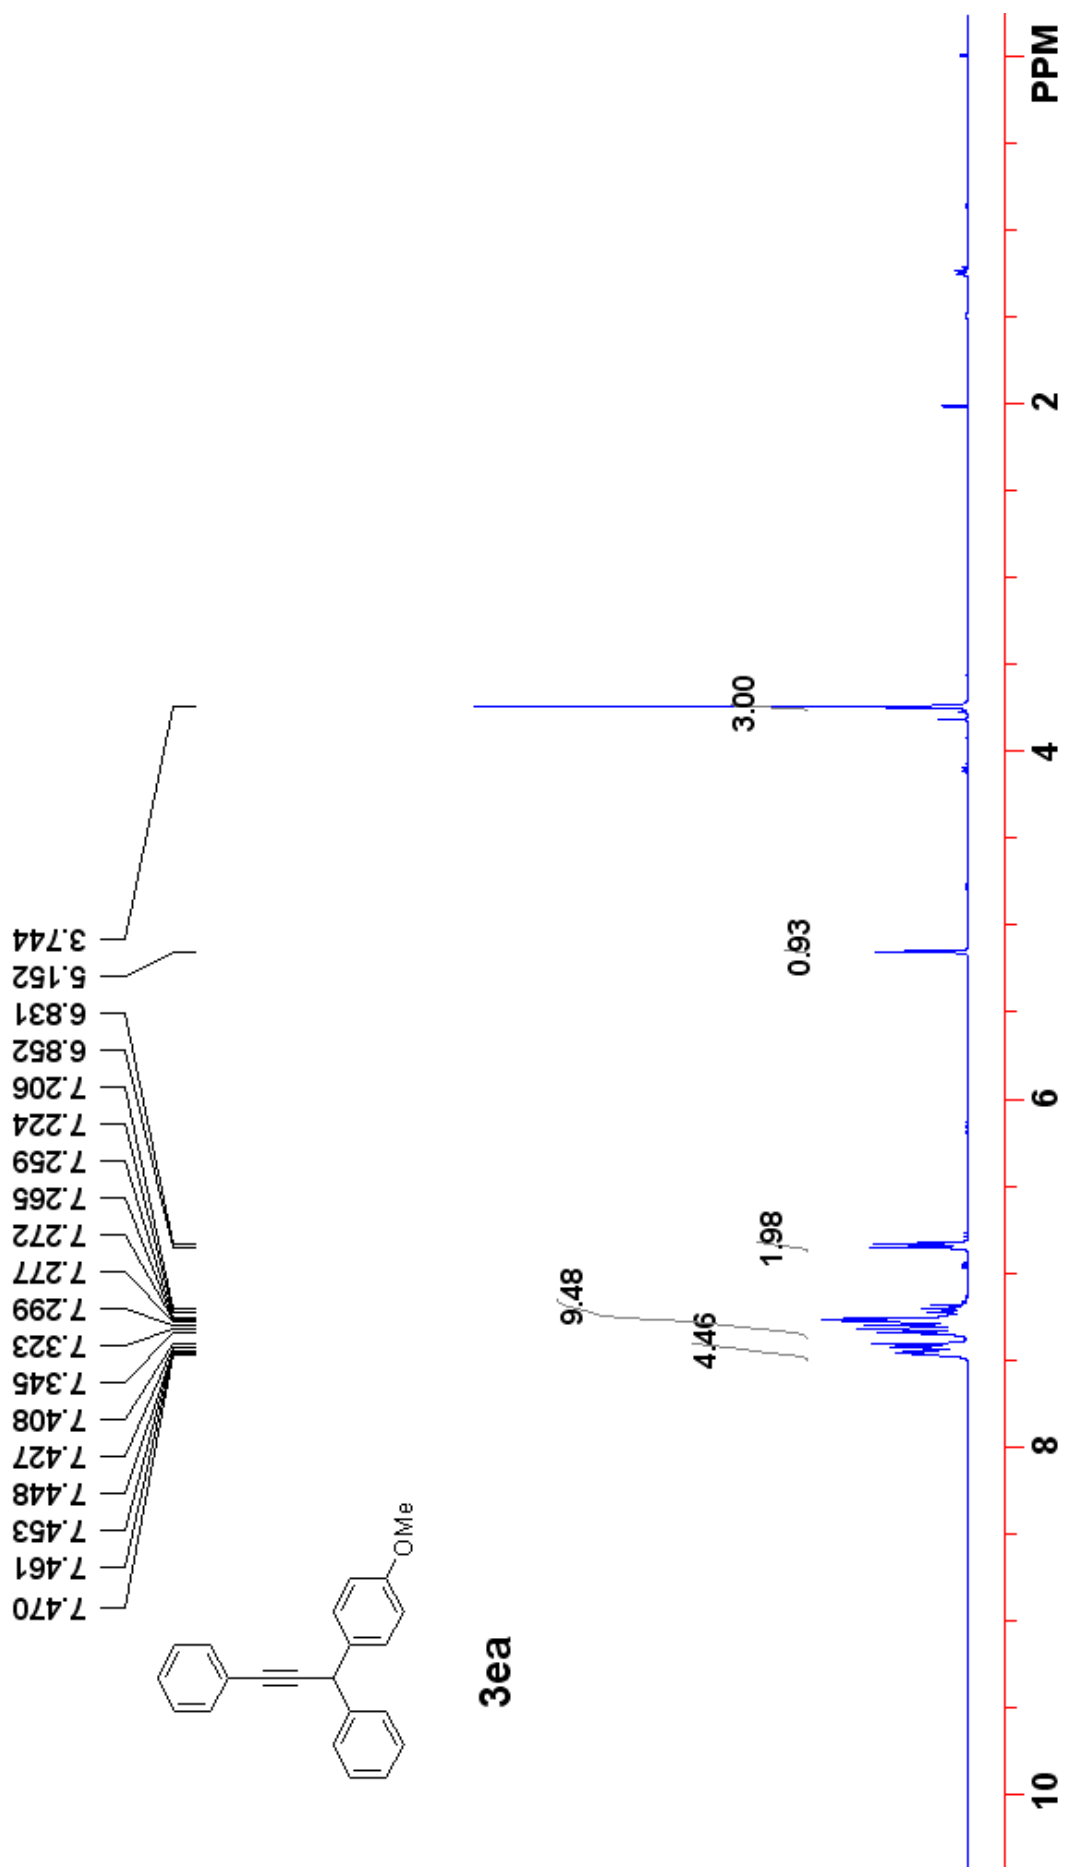



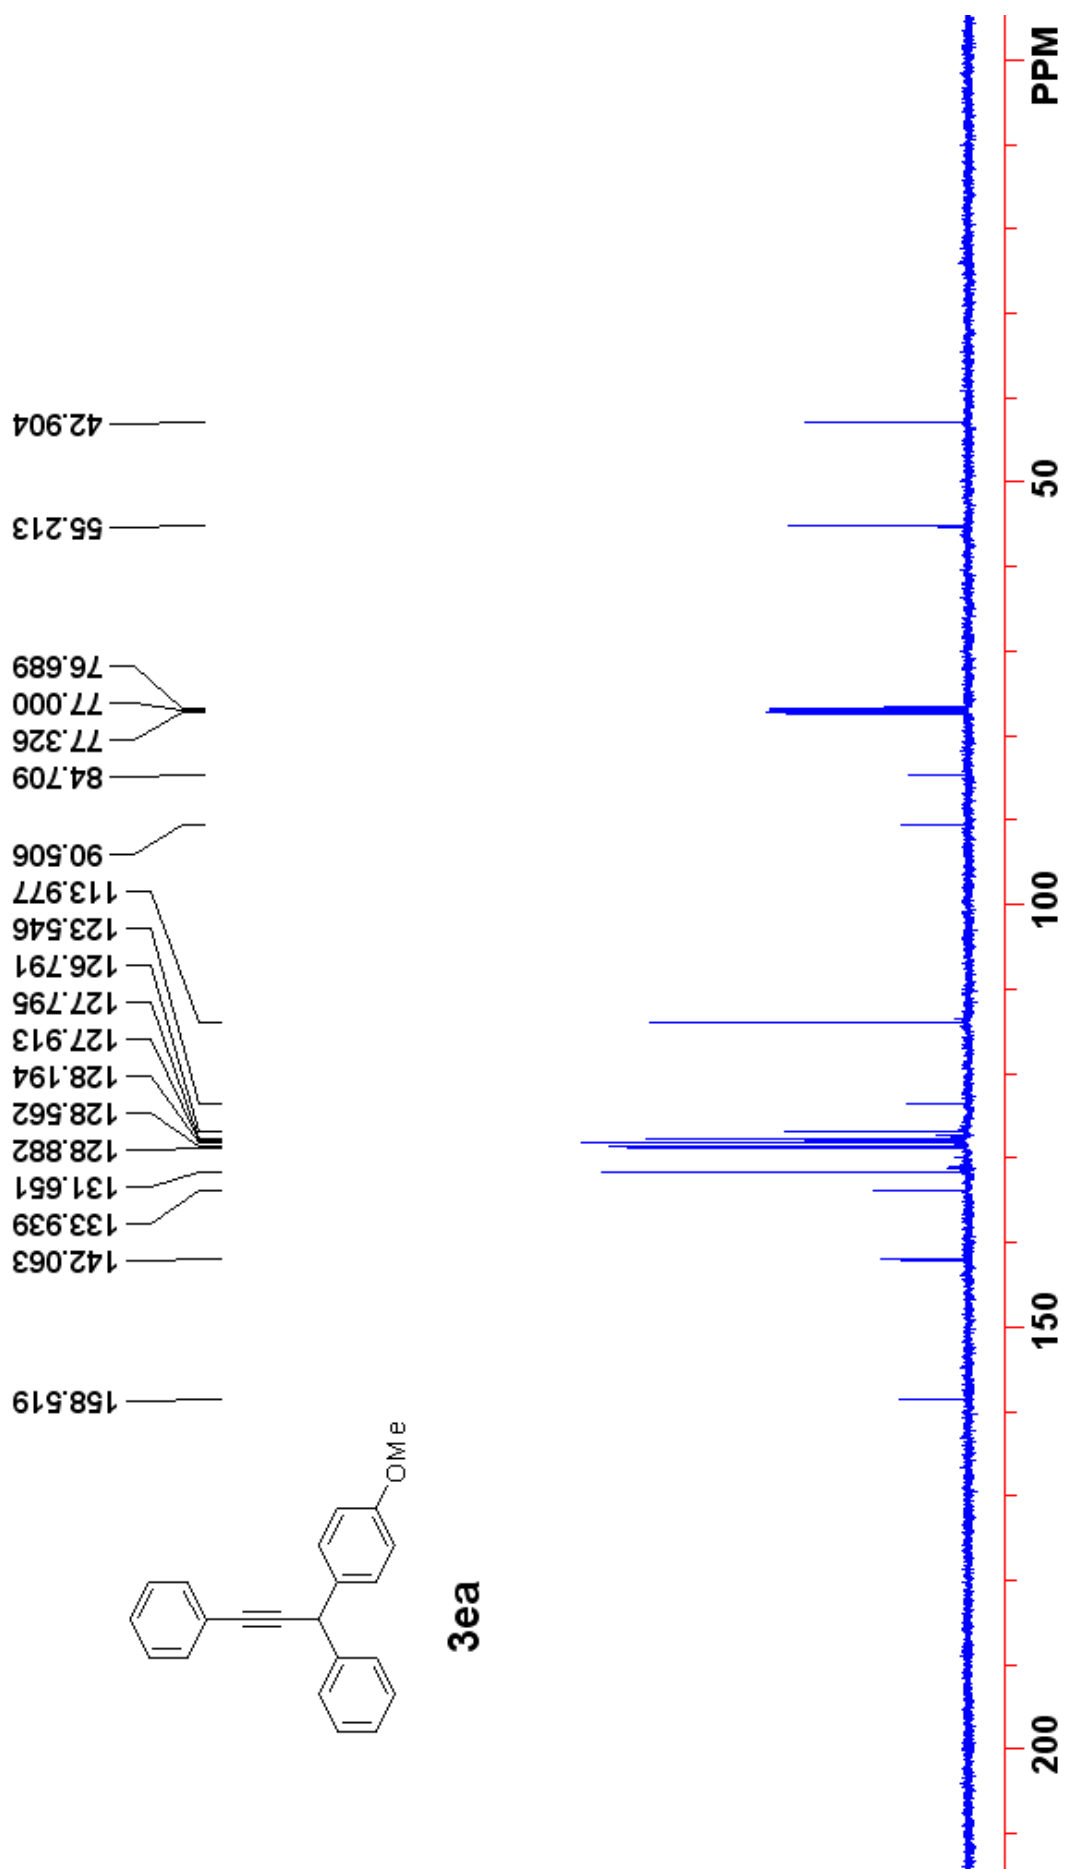

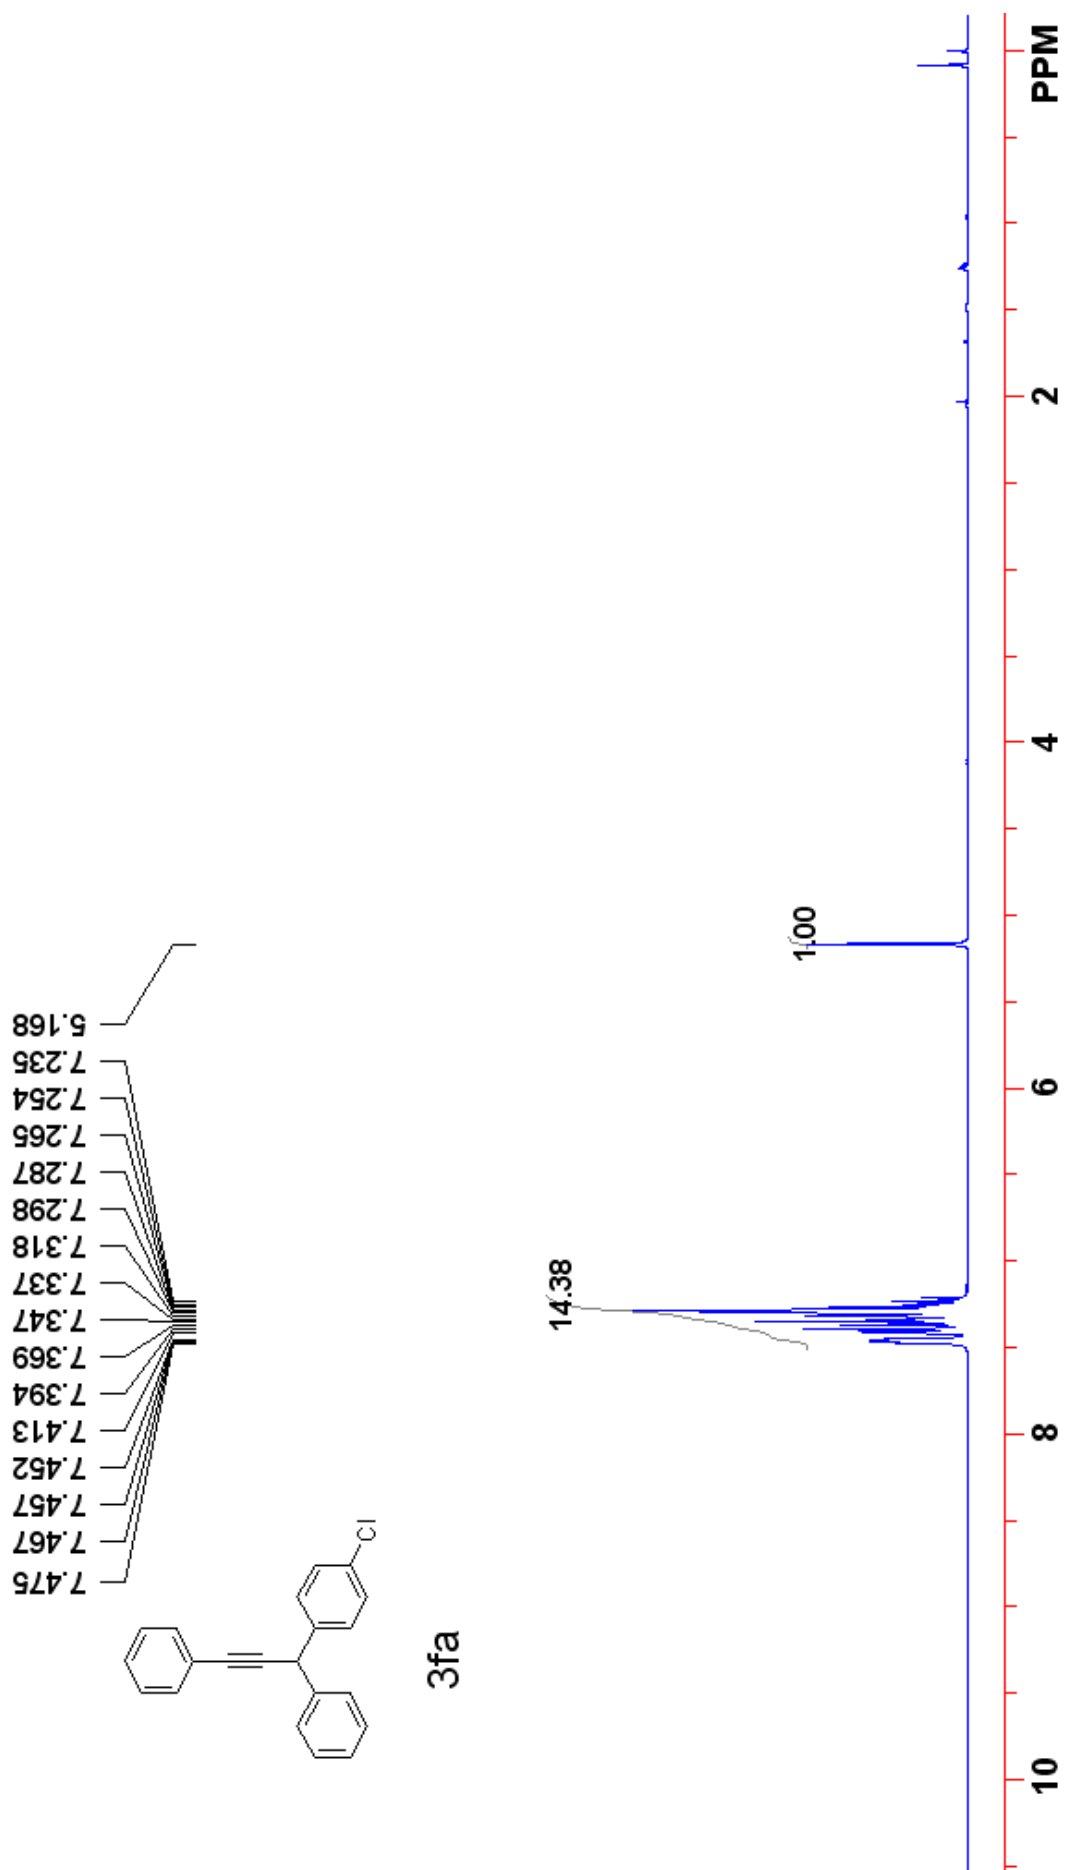

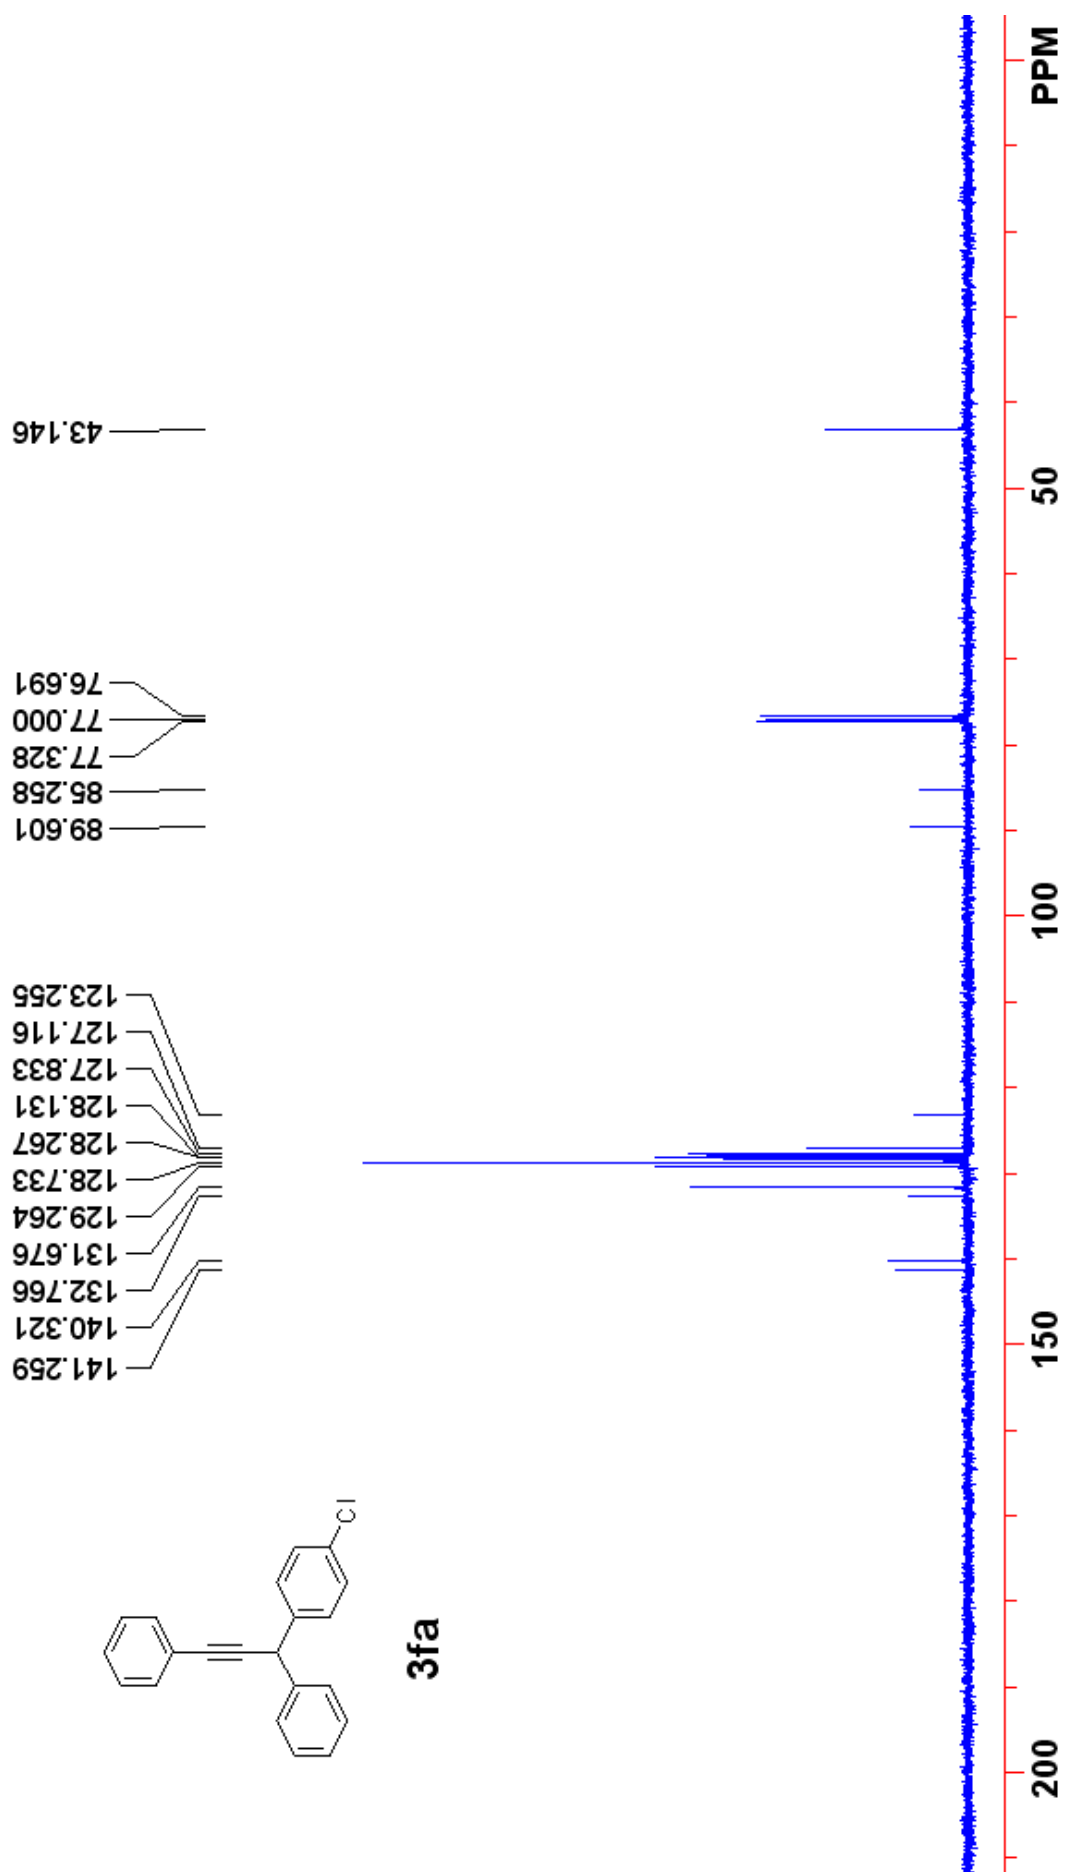

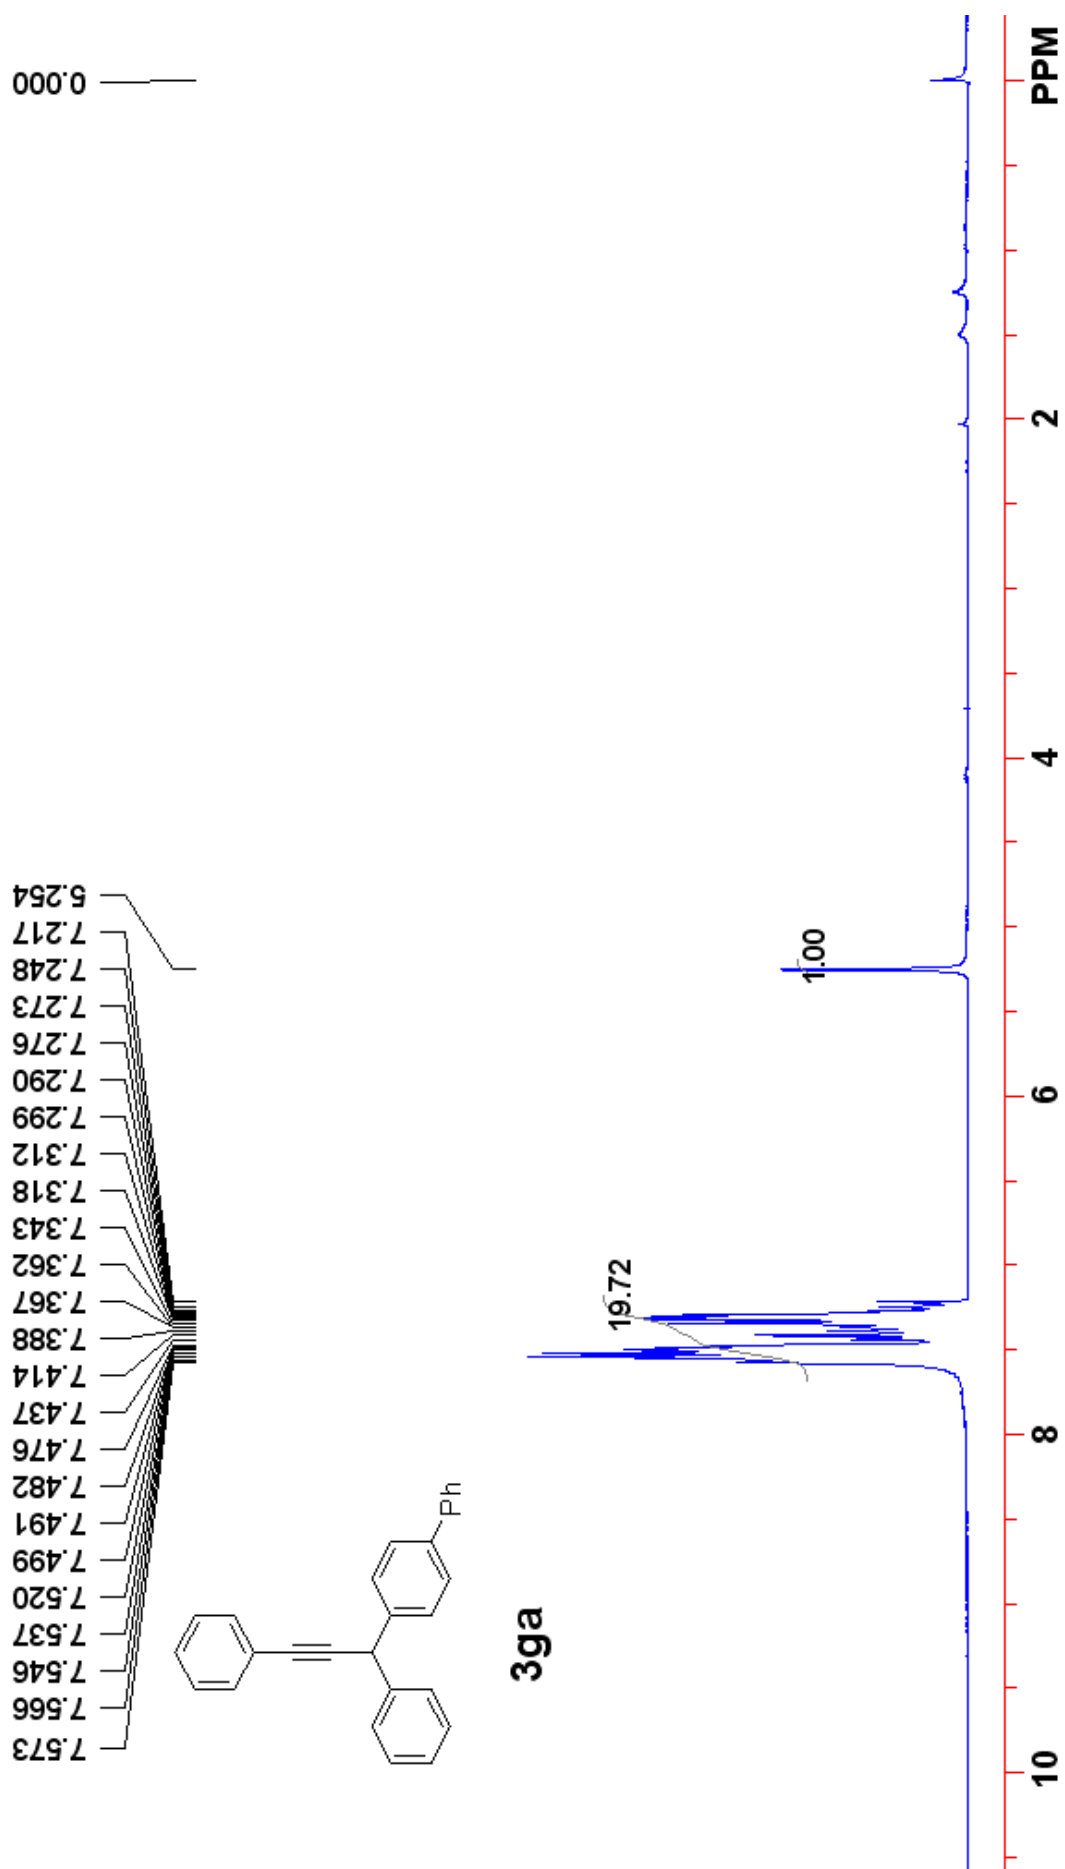

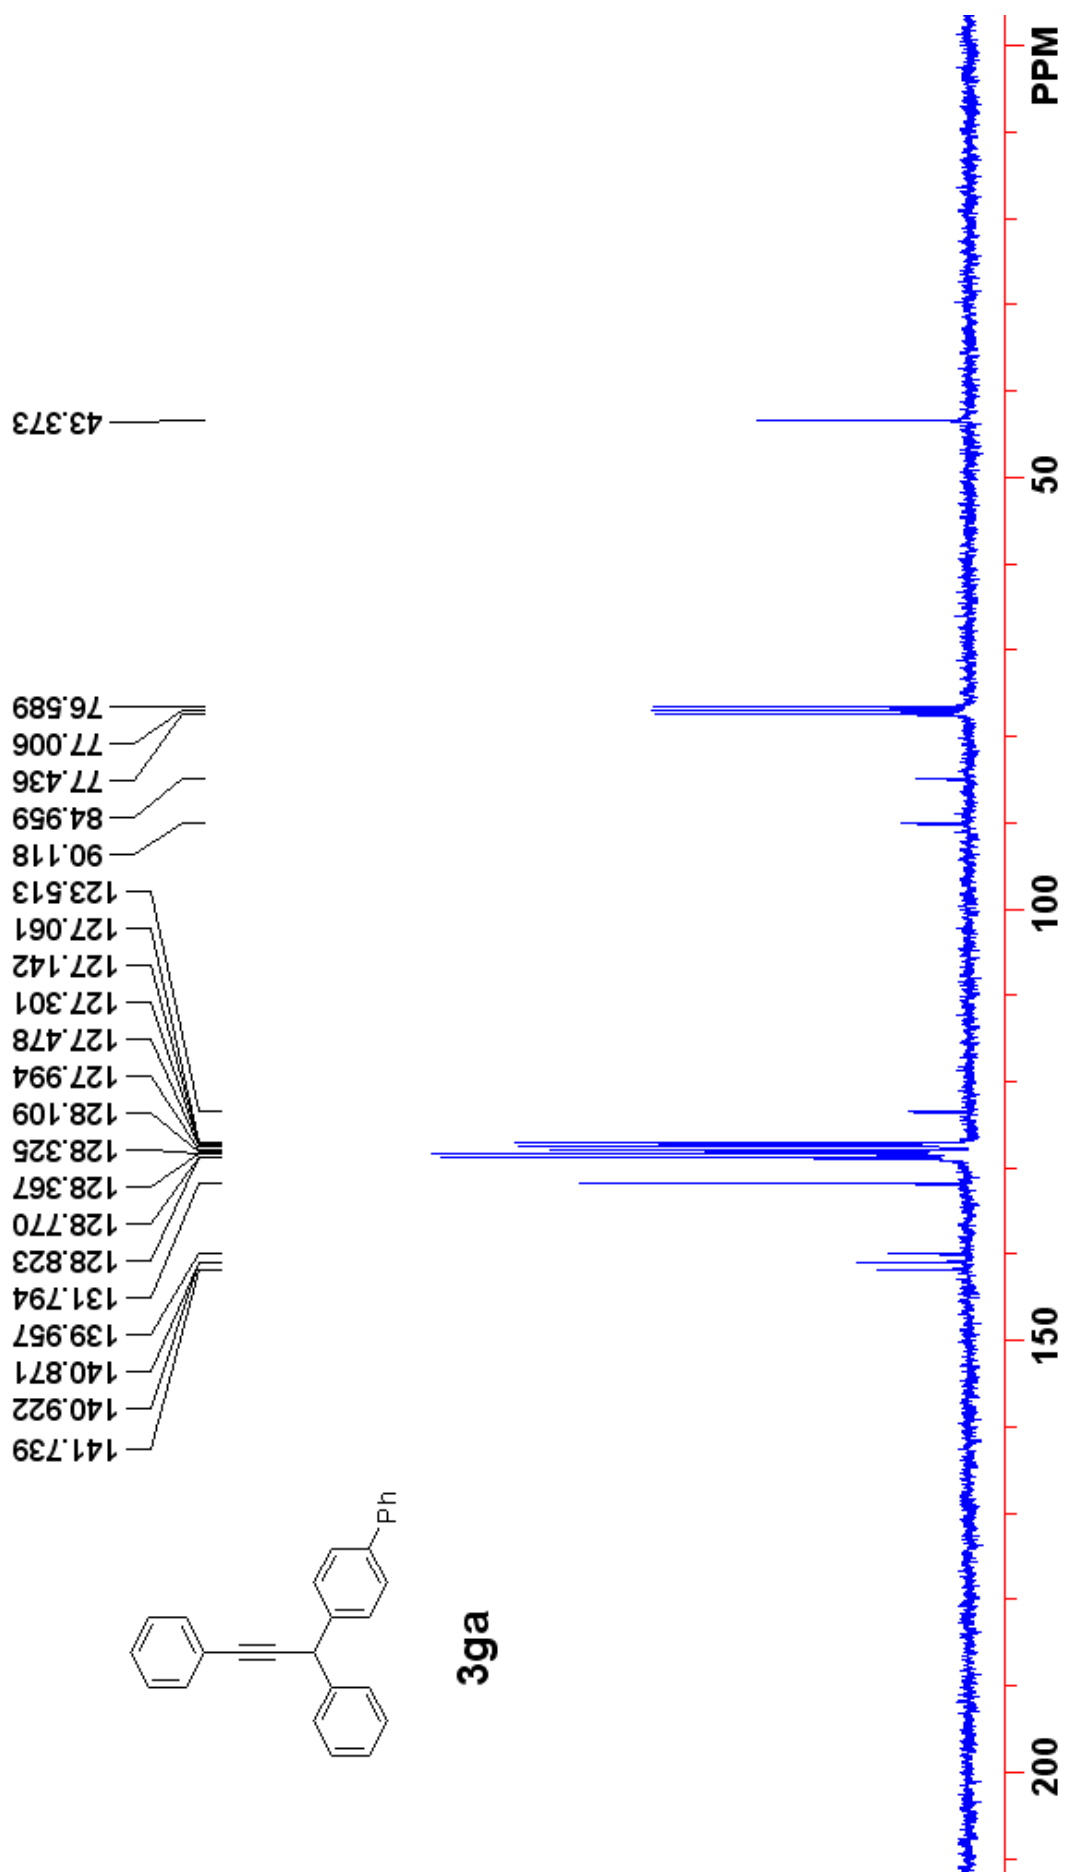

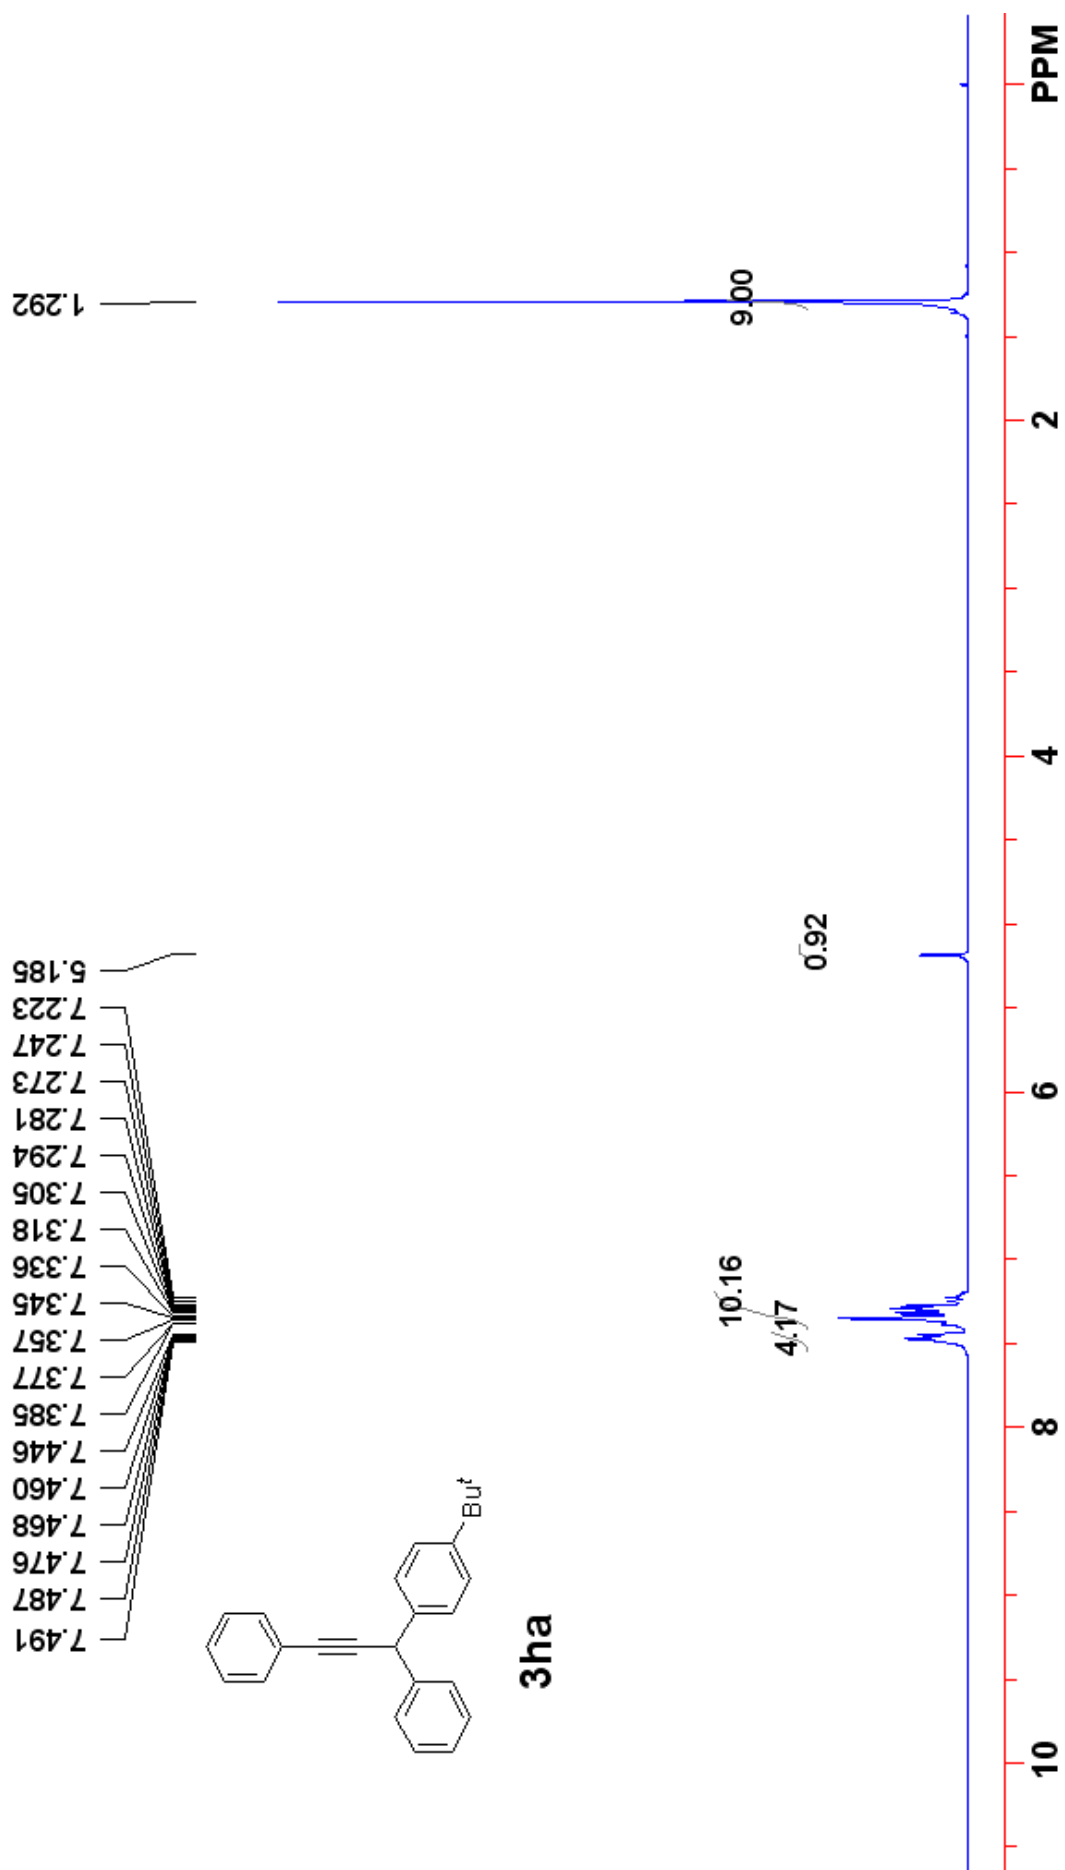

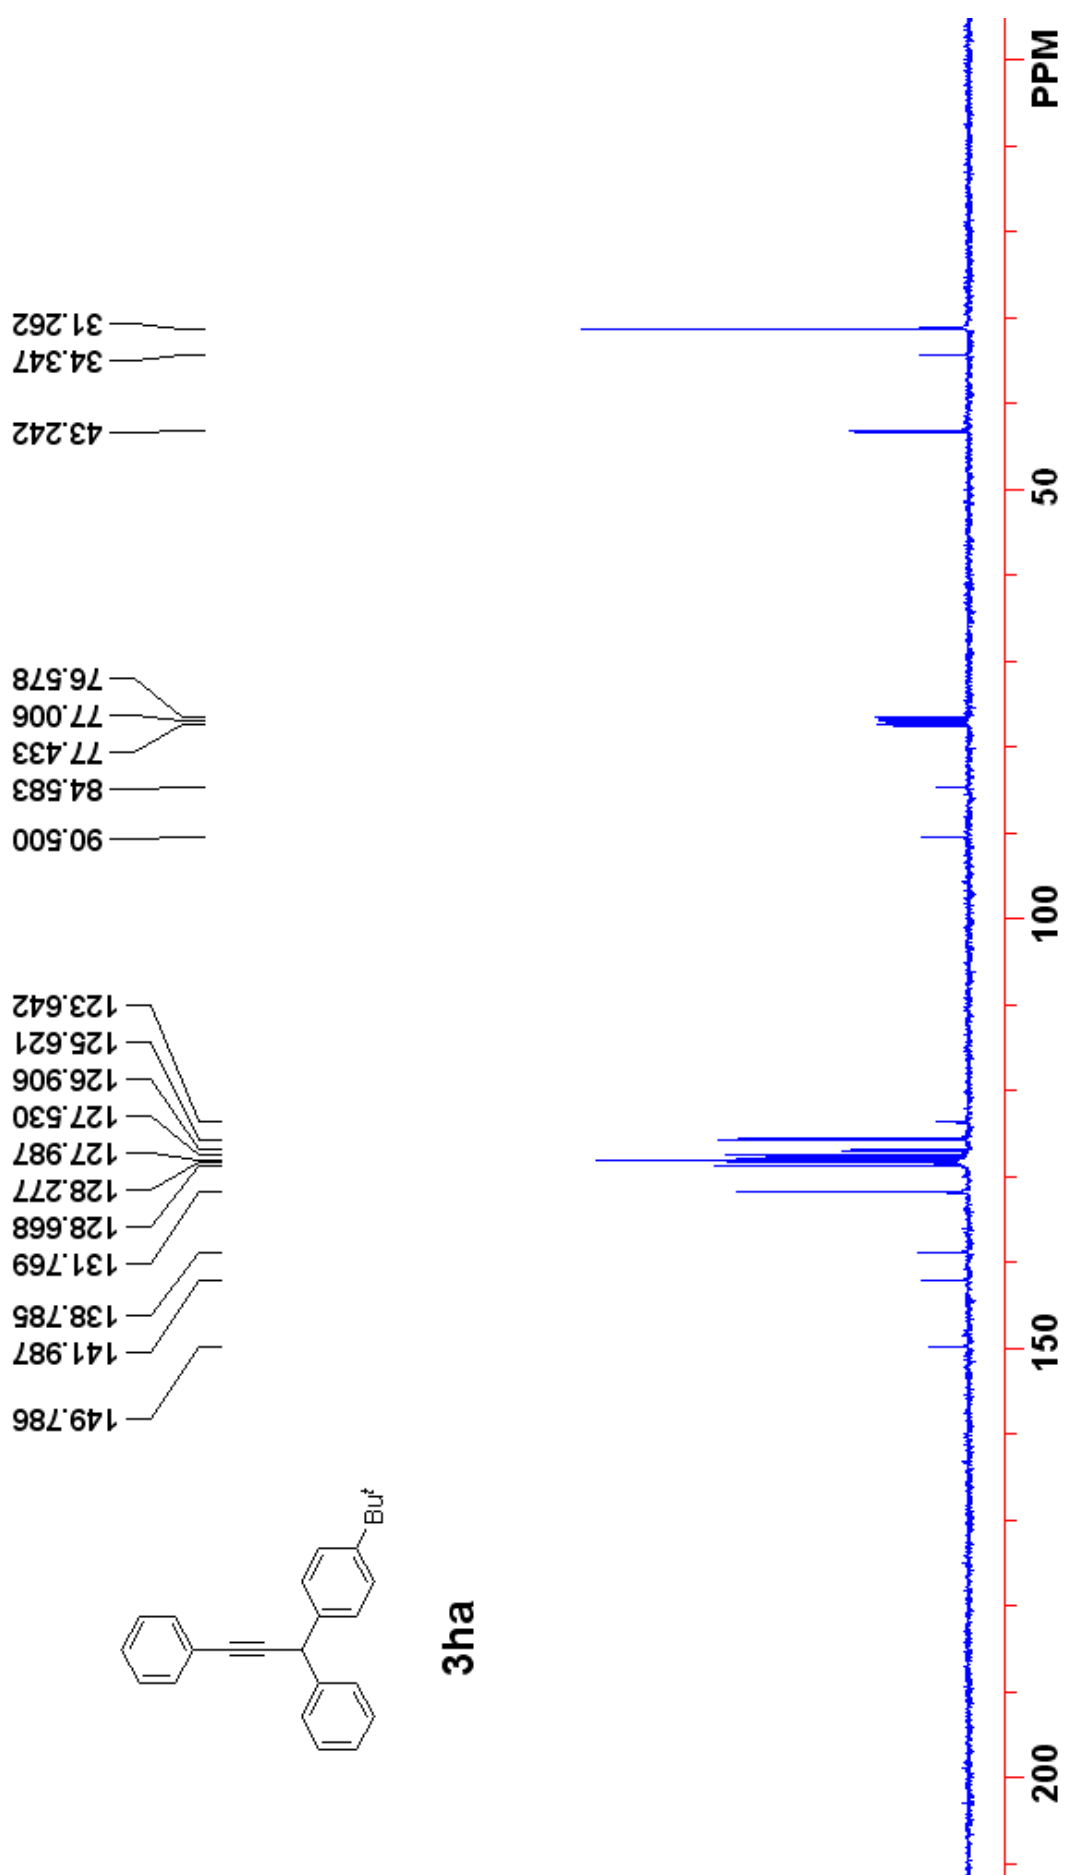

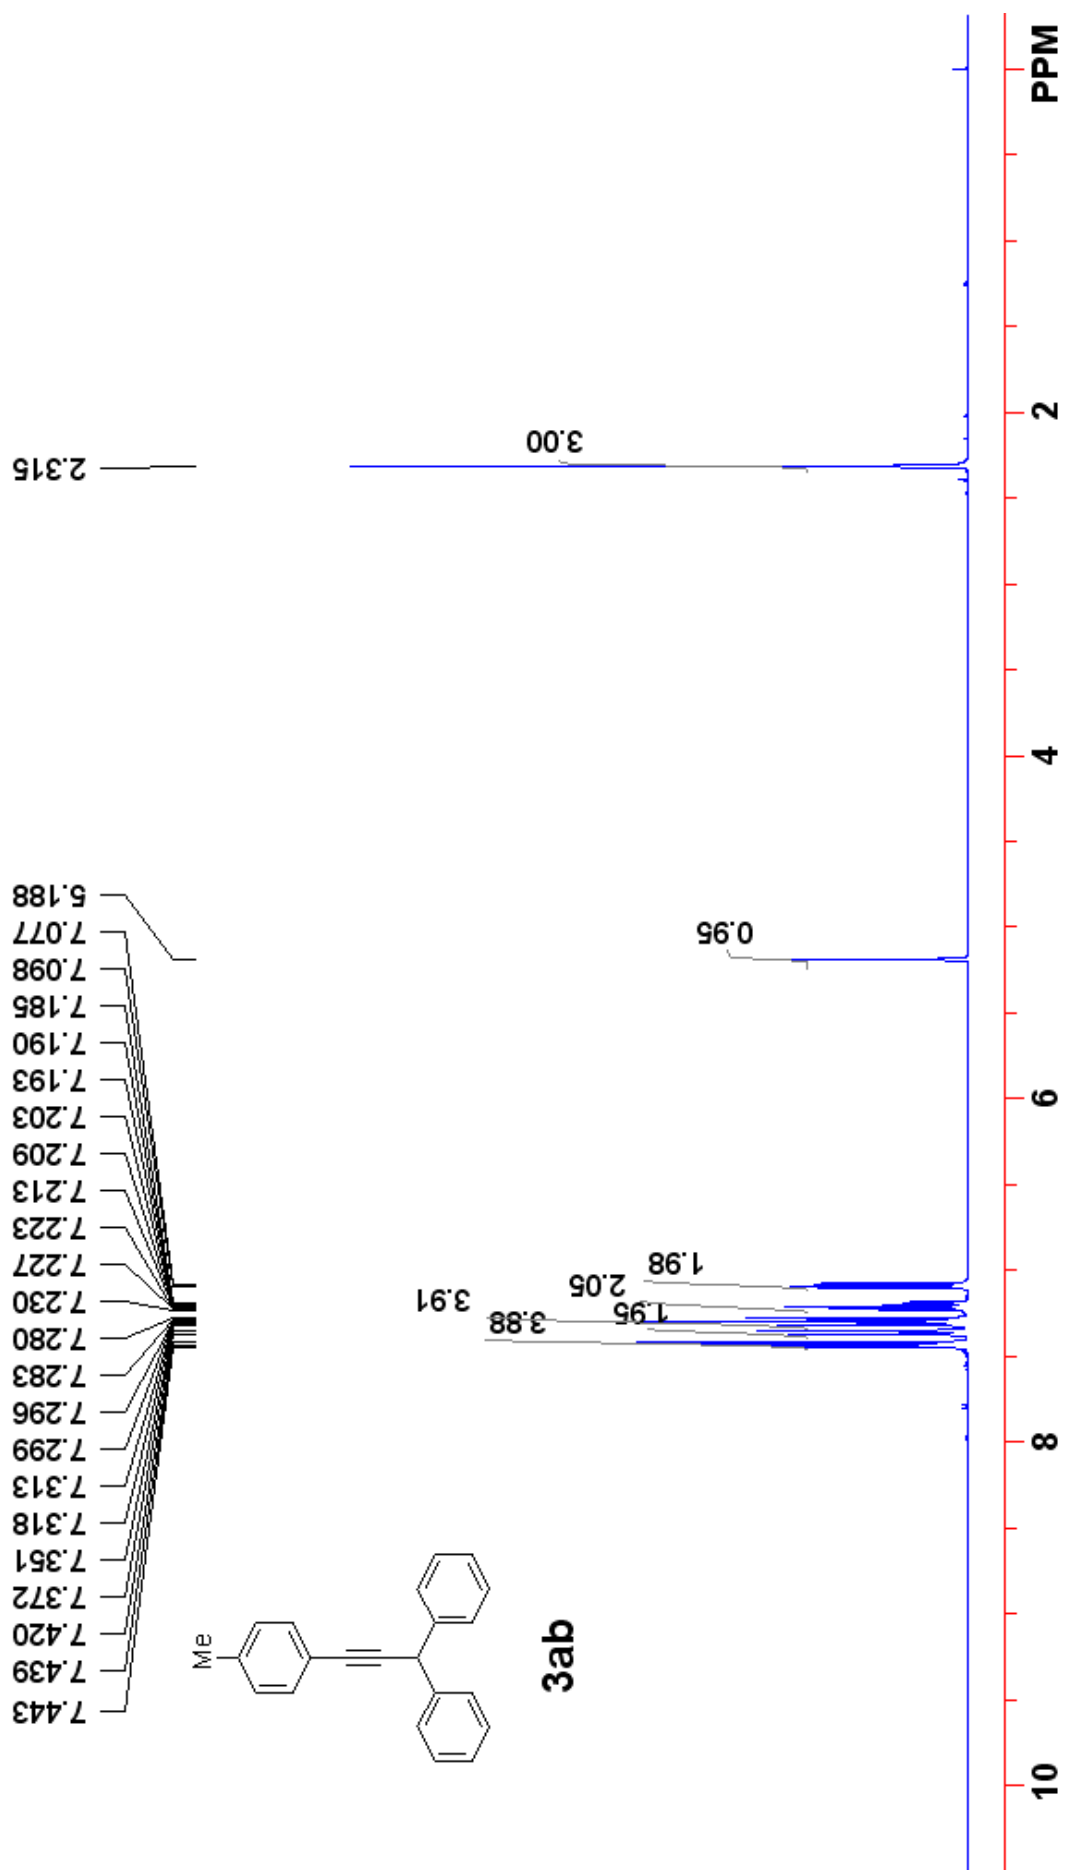



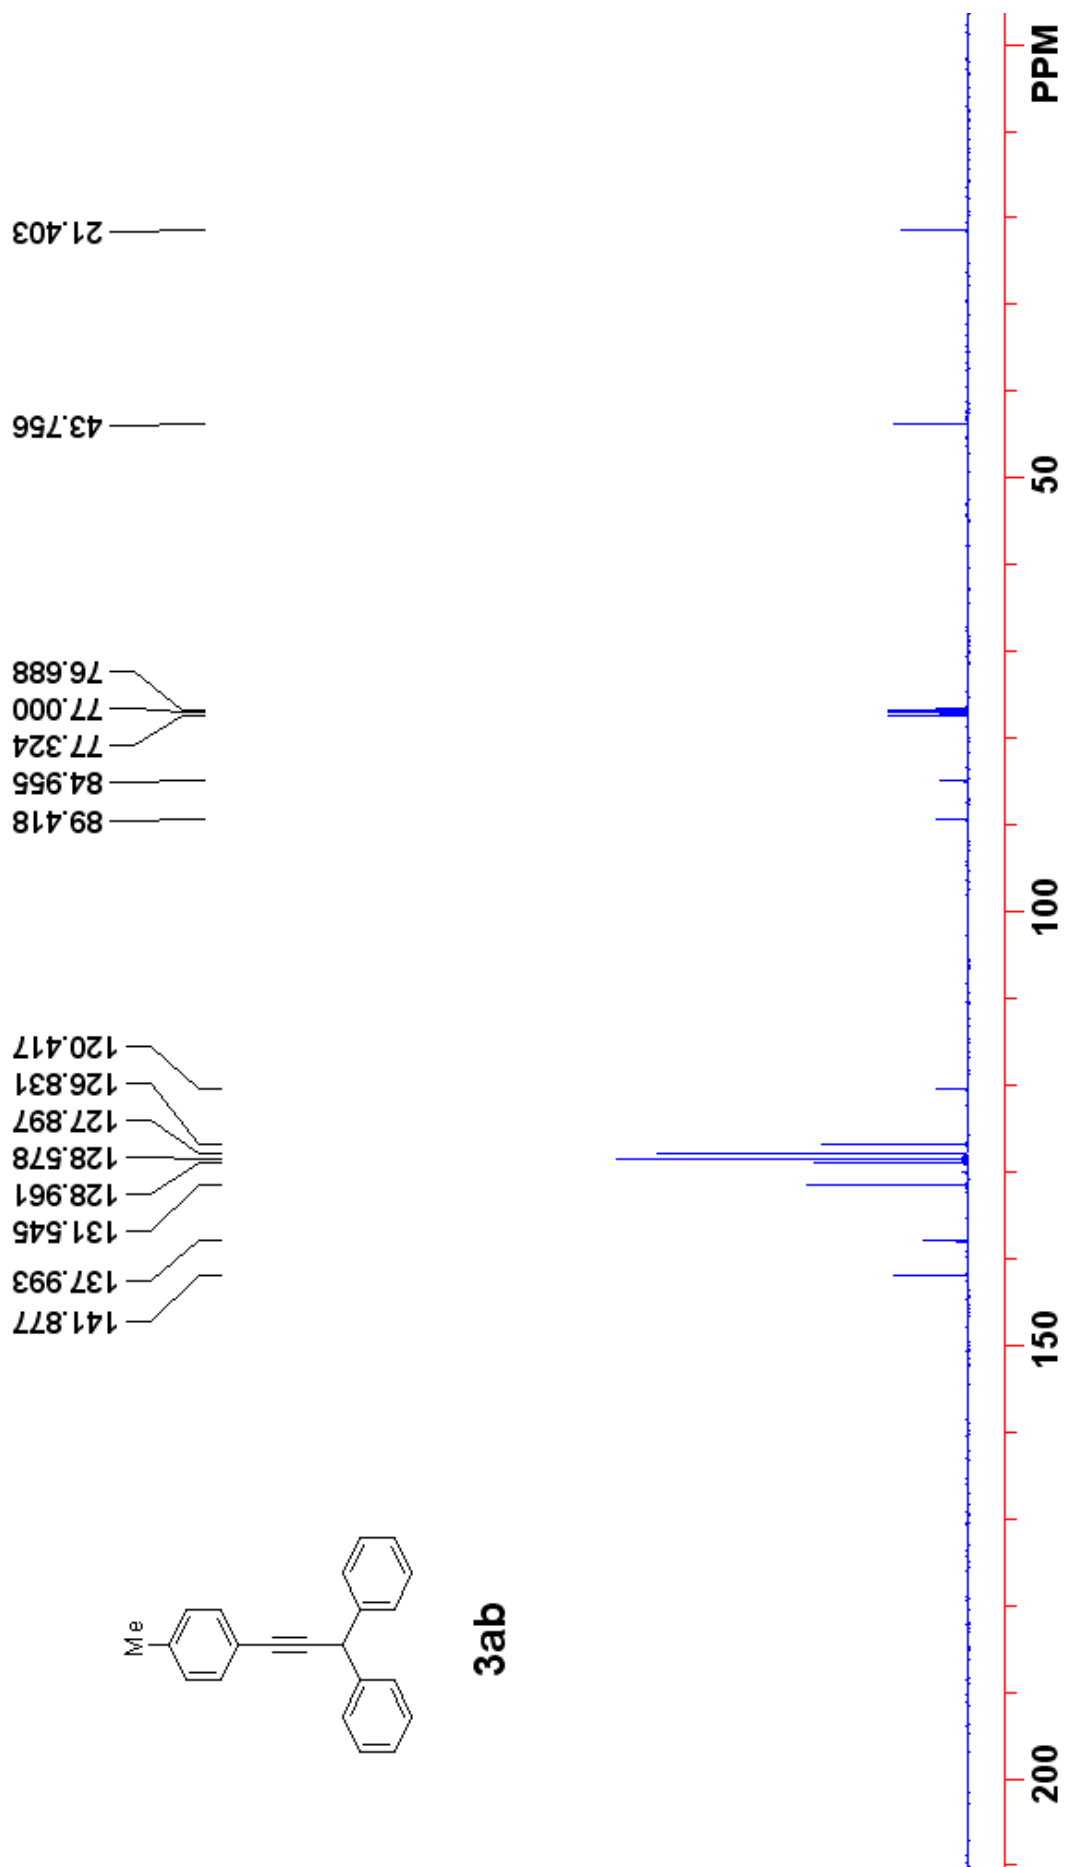

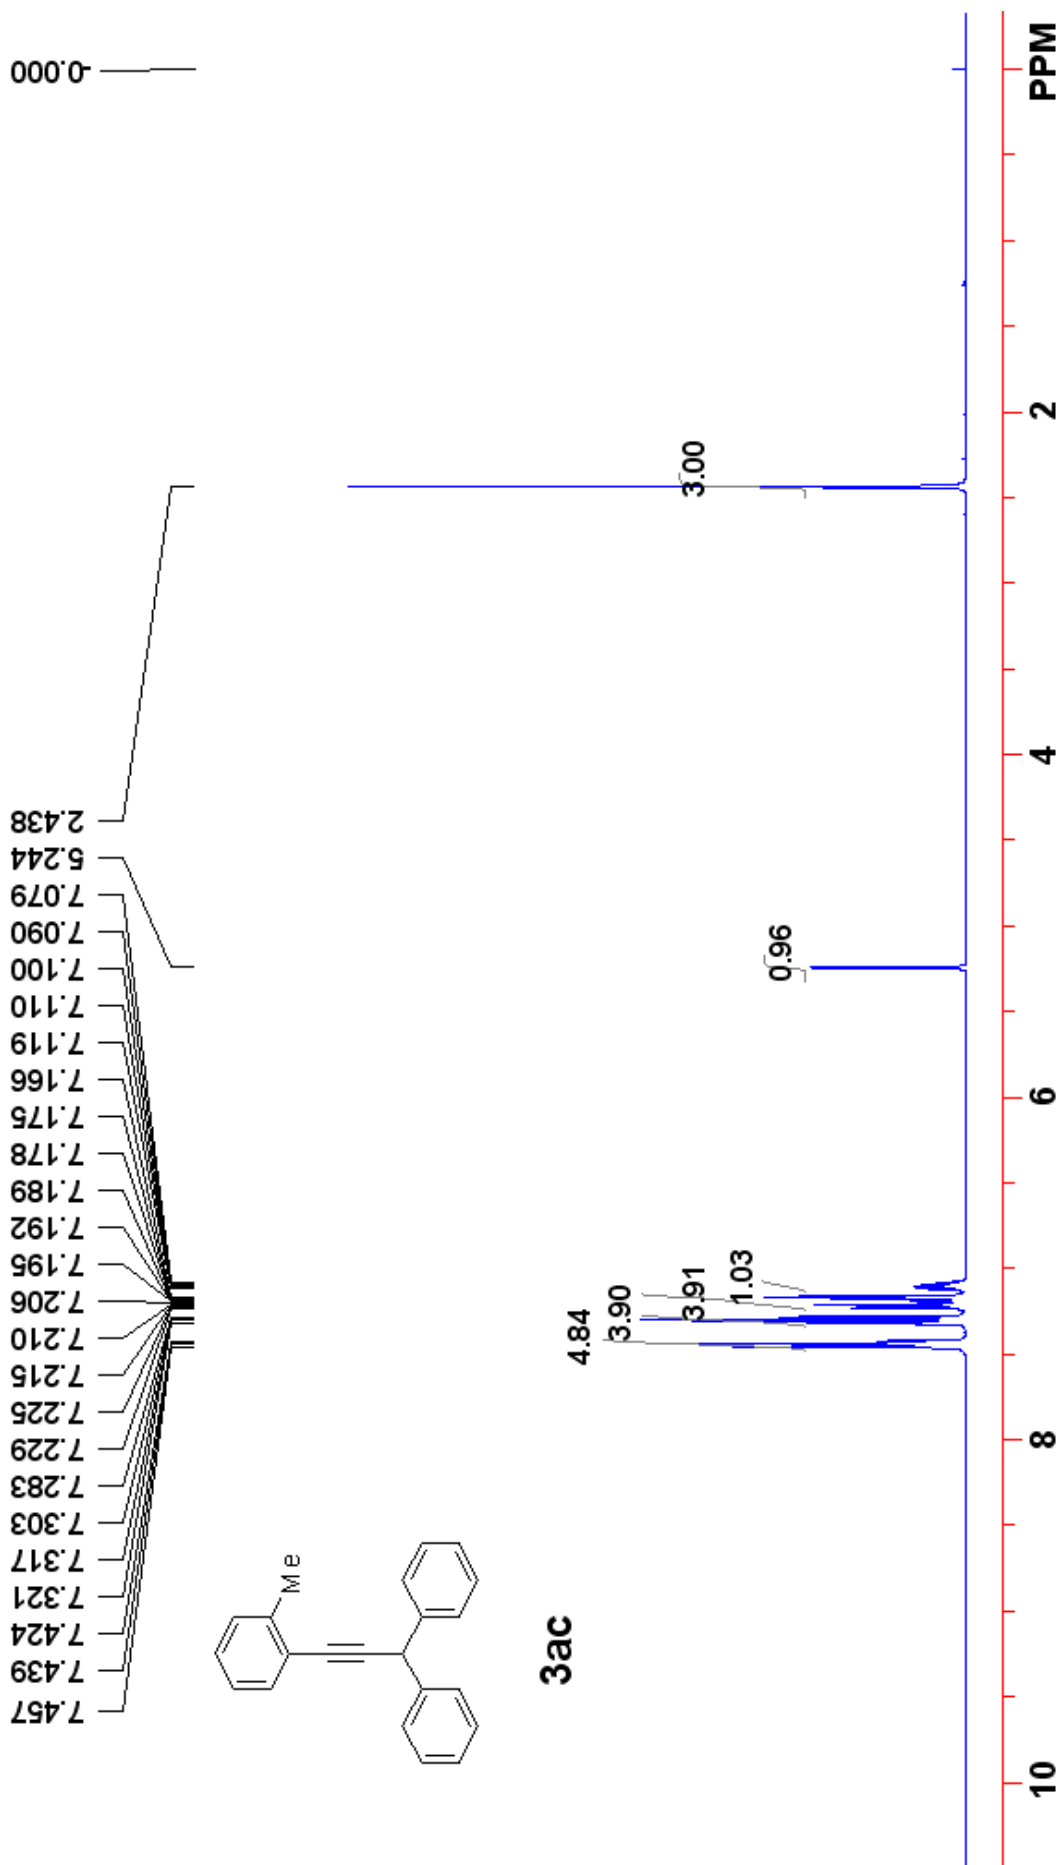

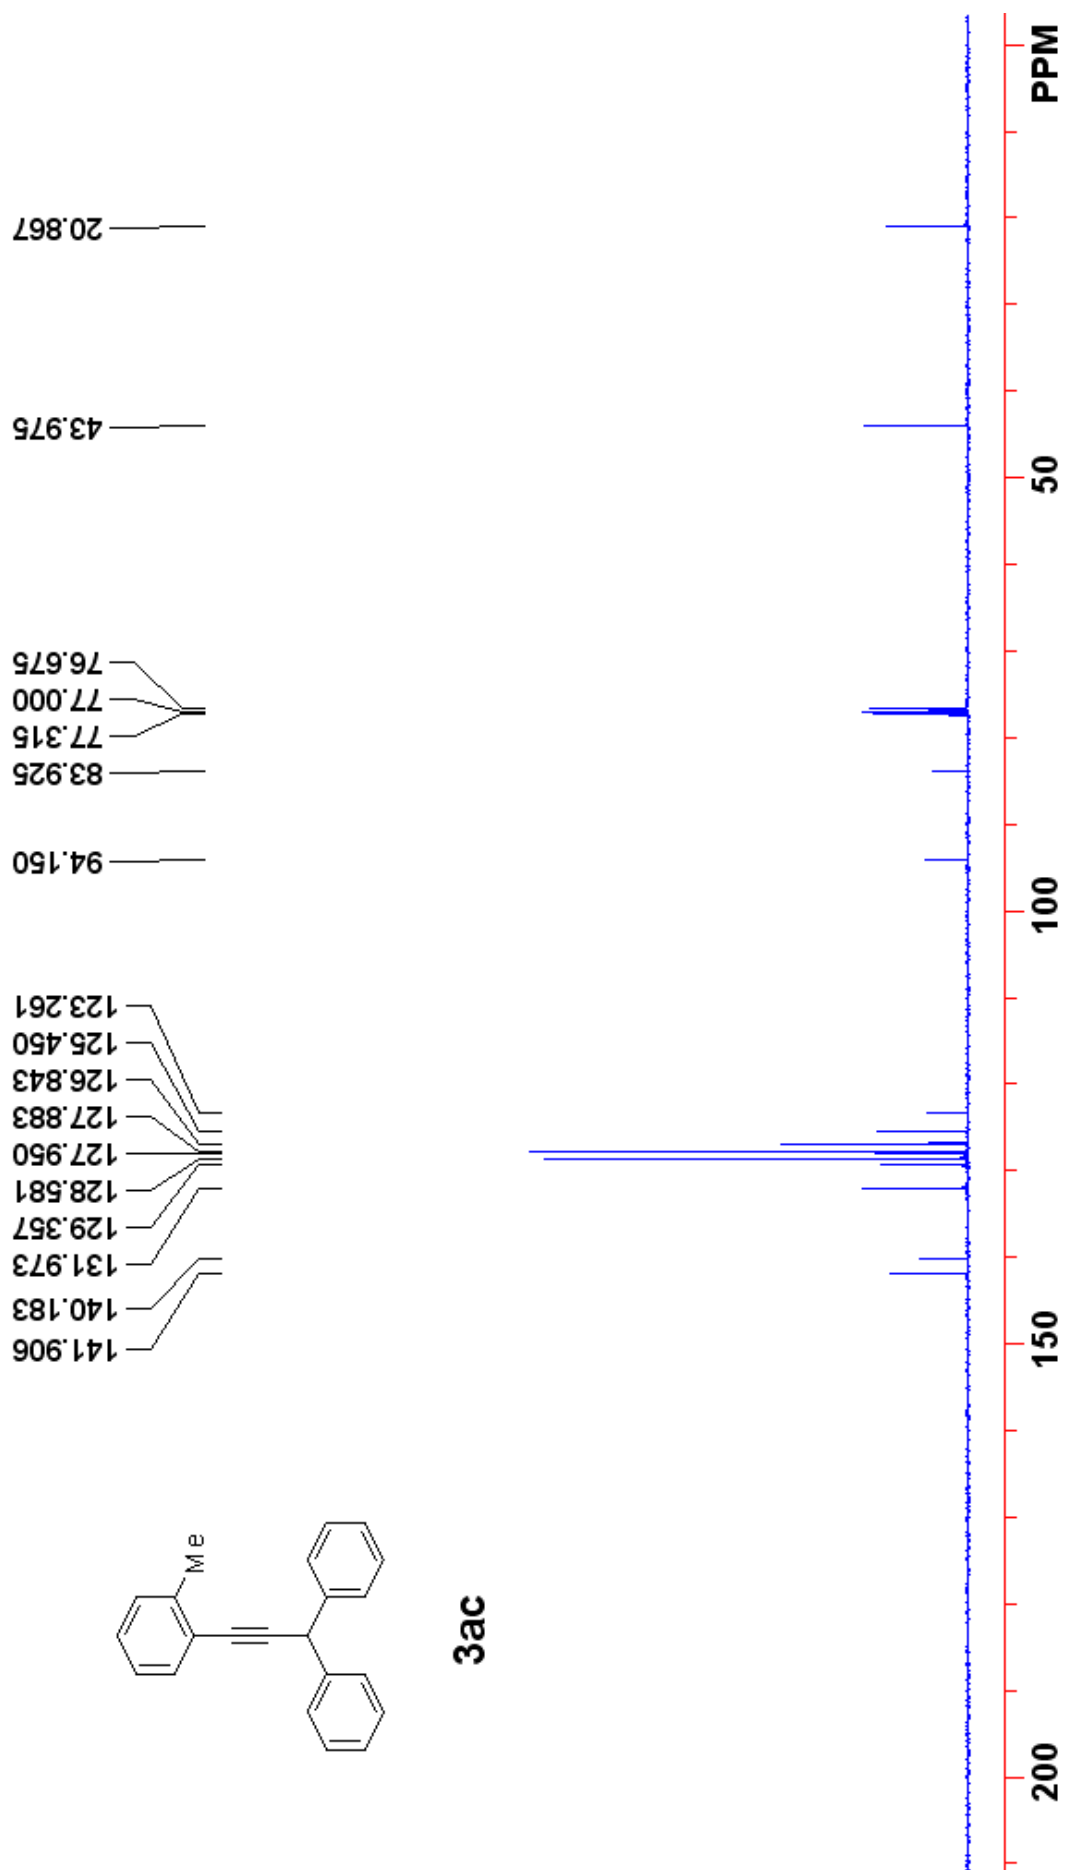

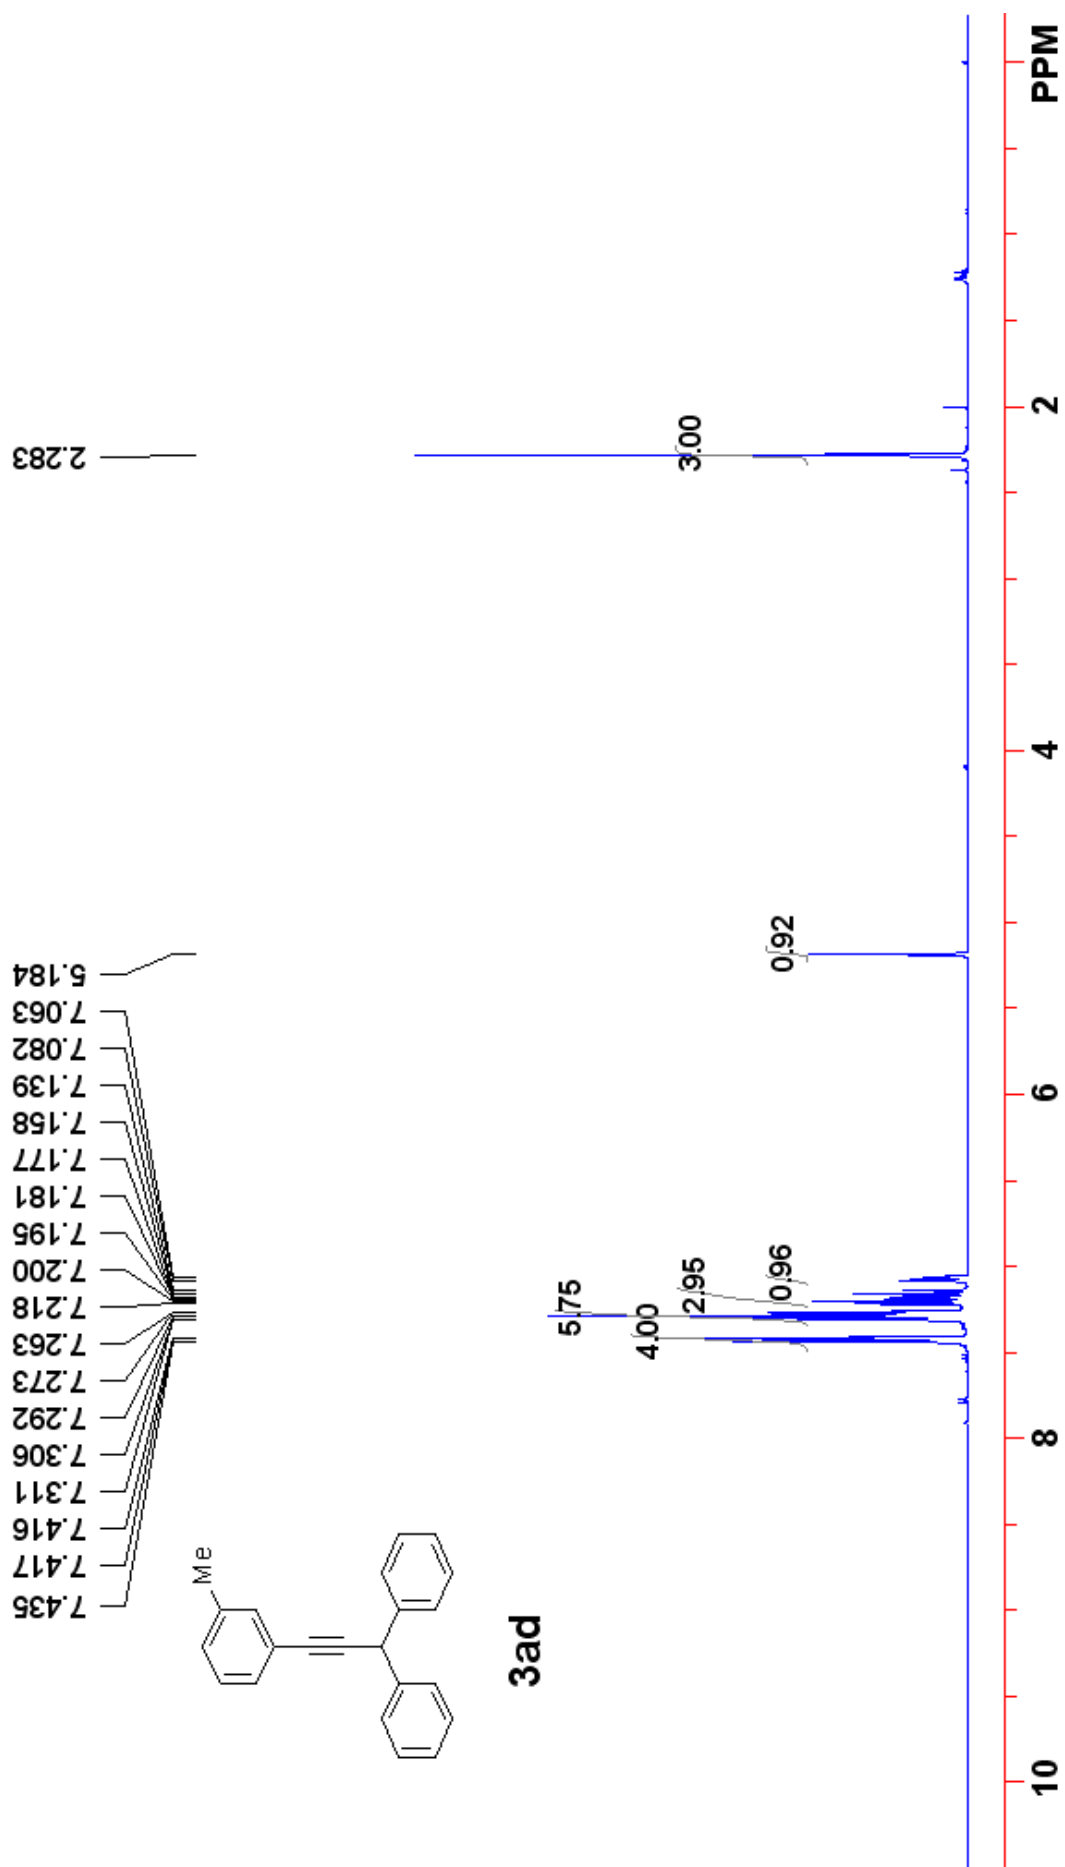

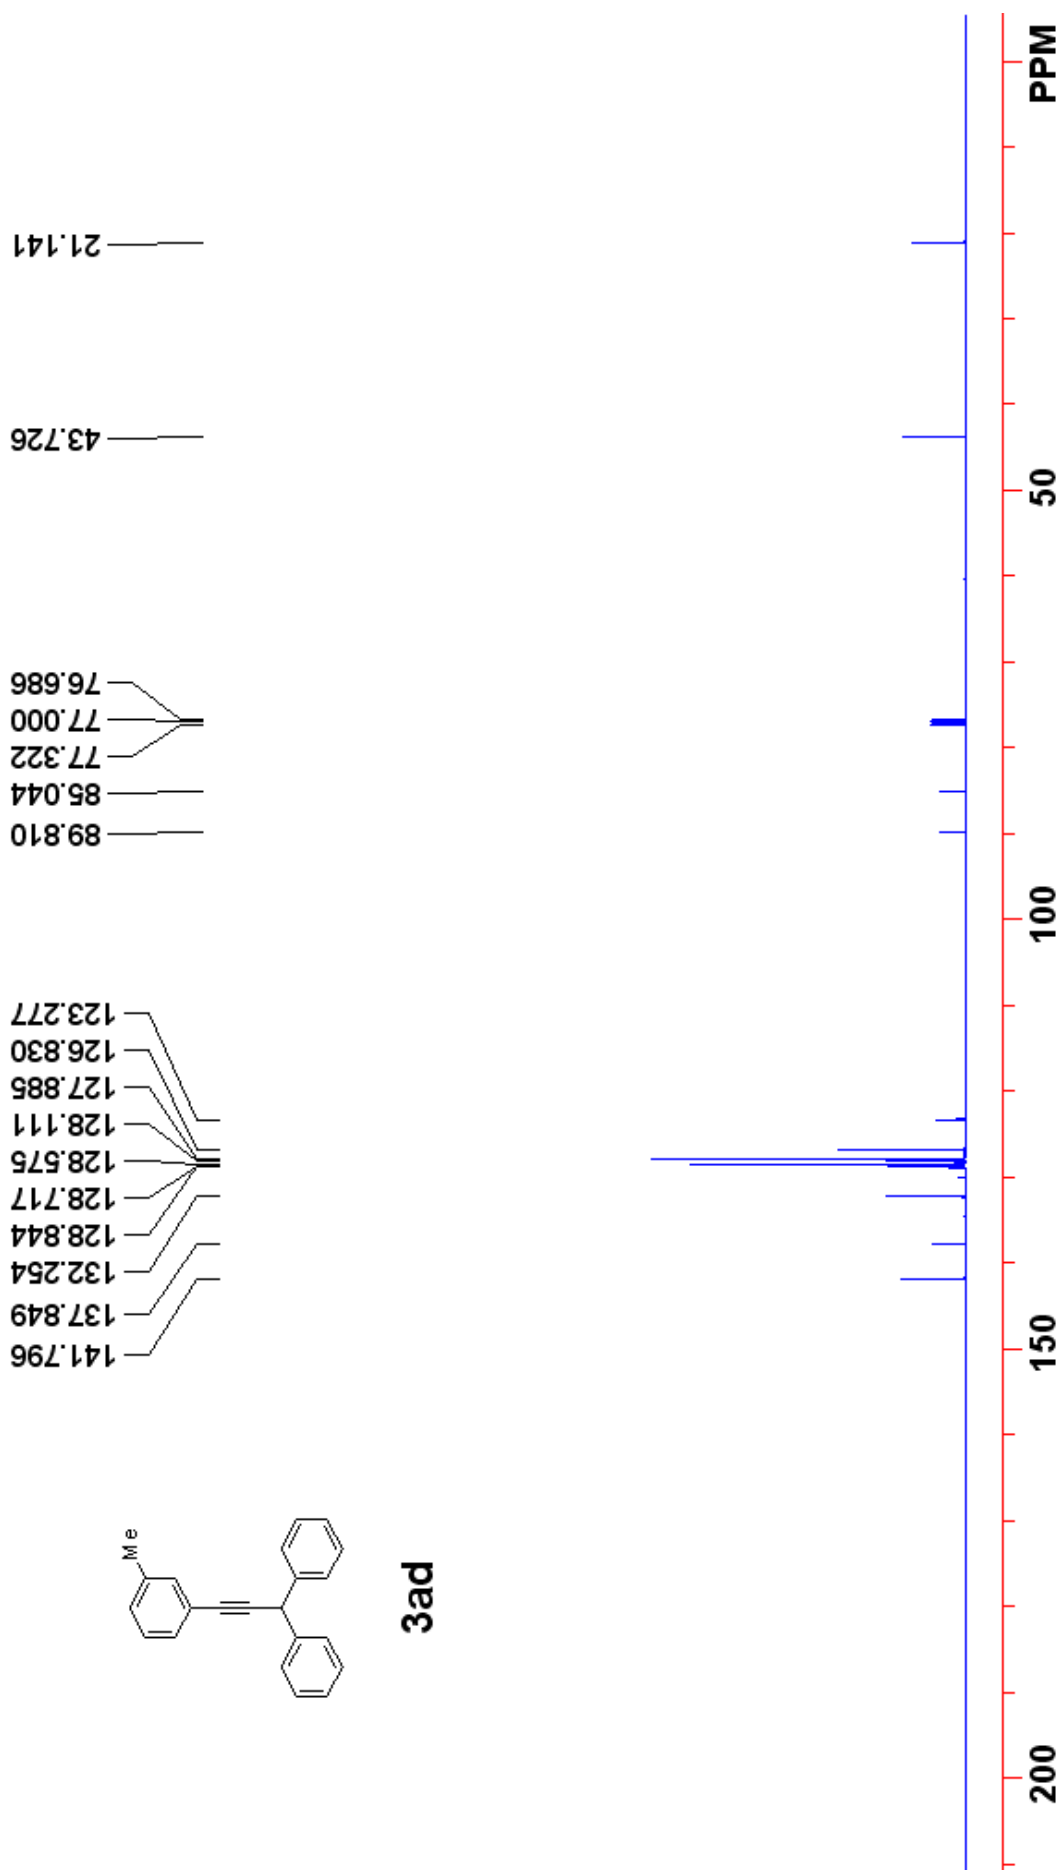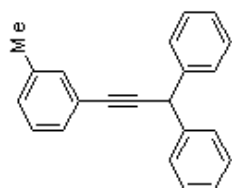

**3ad**

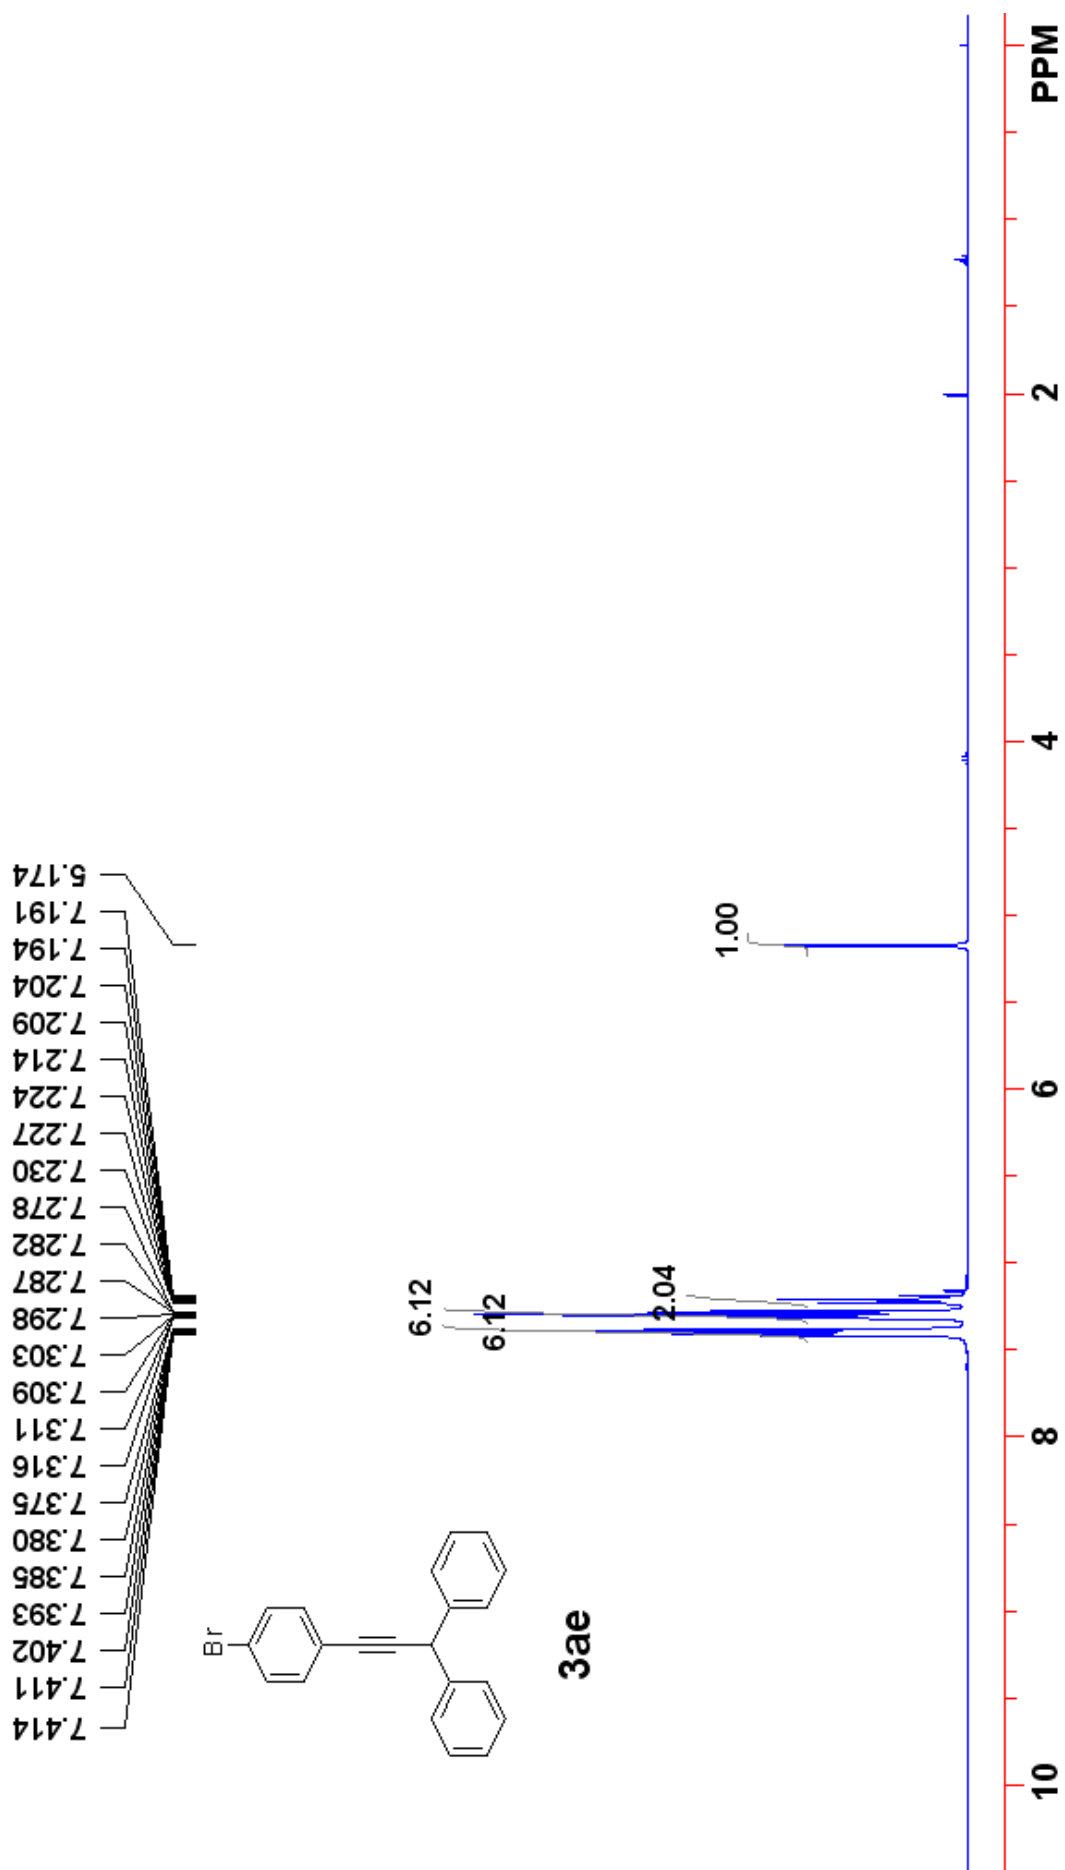

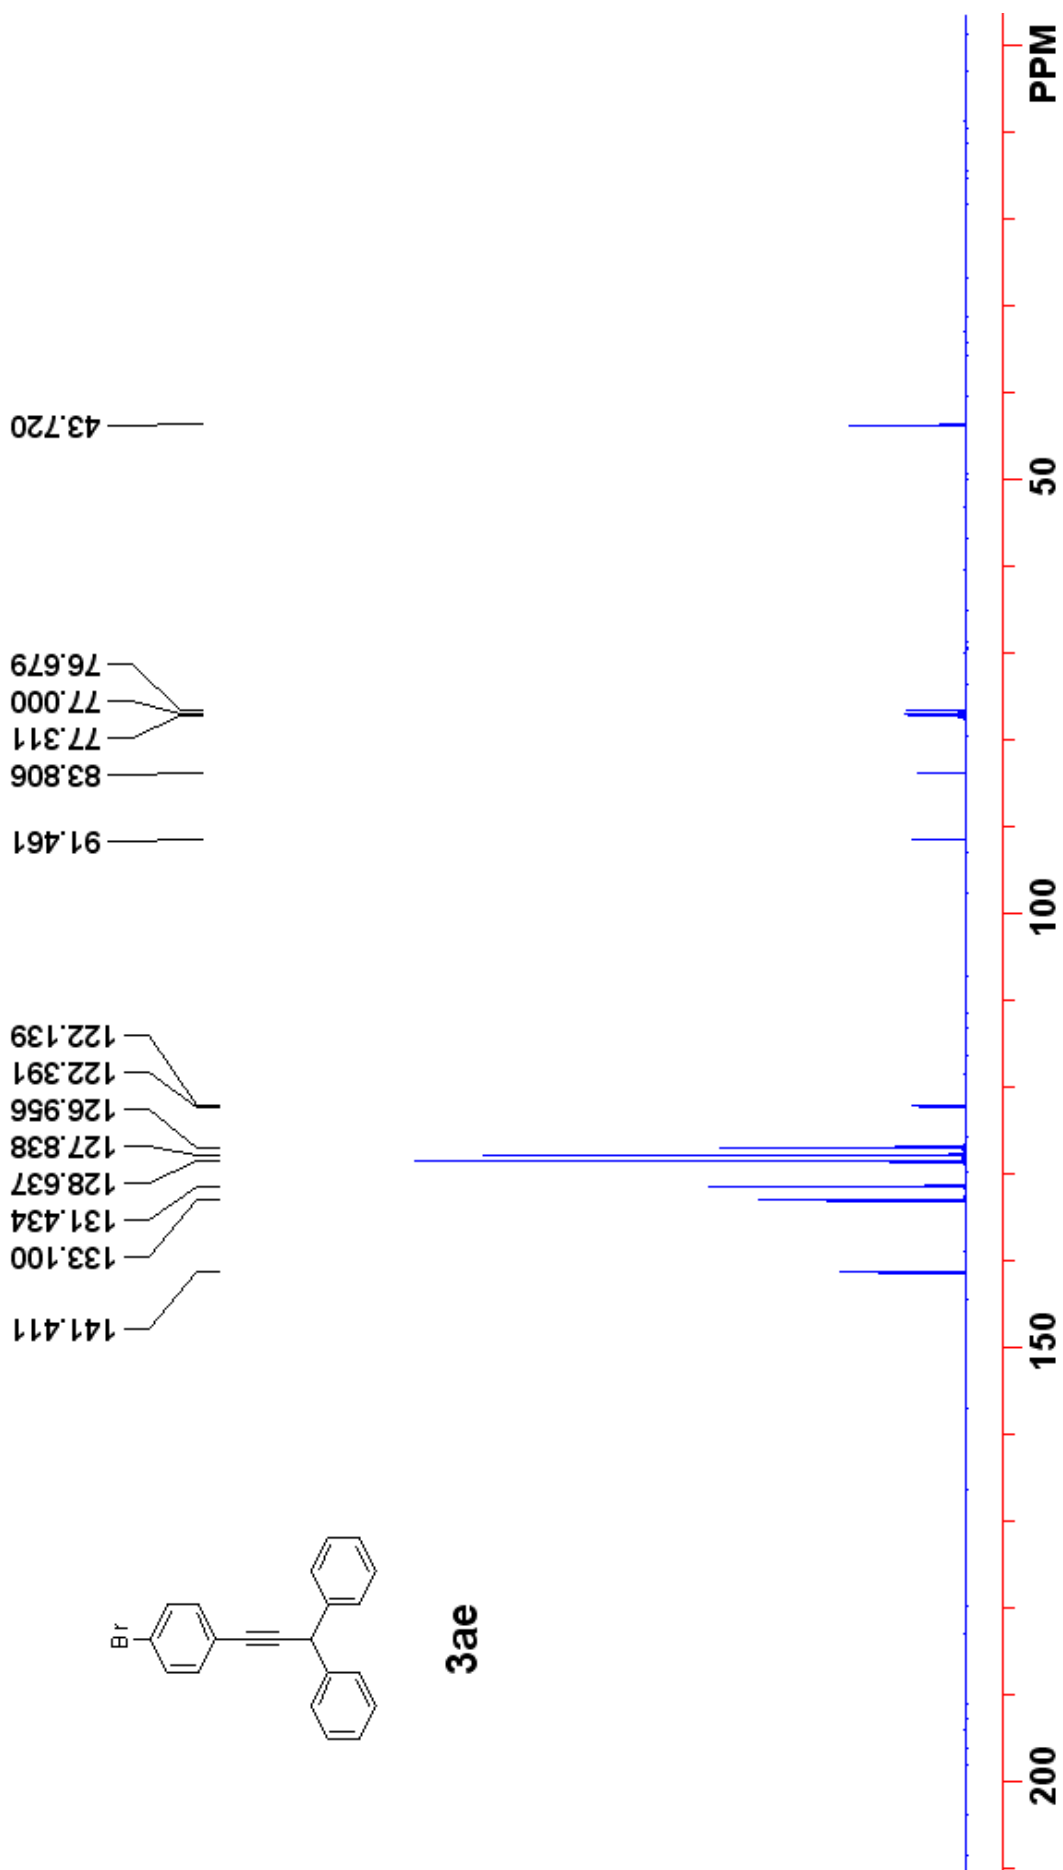

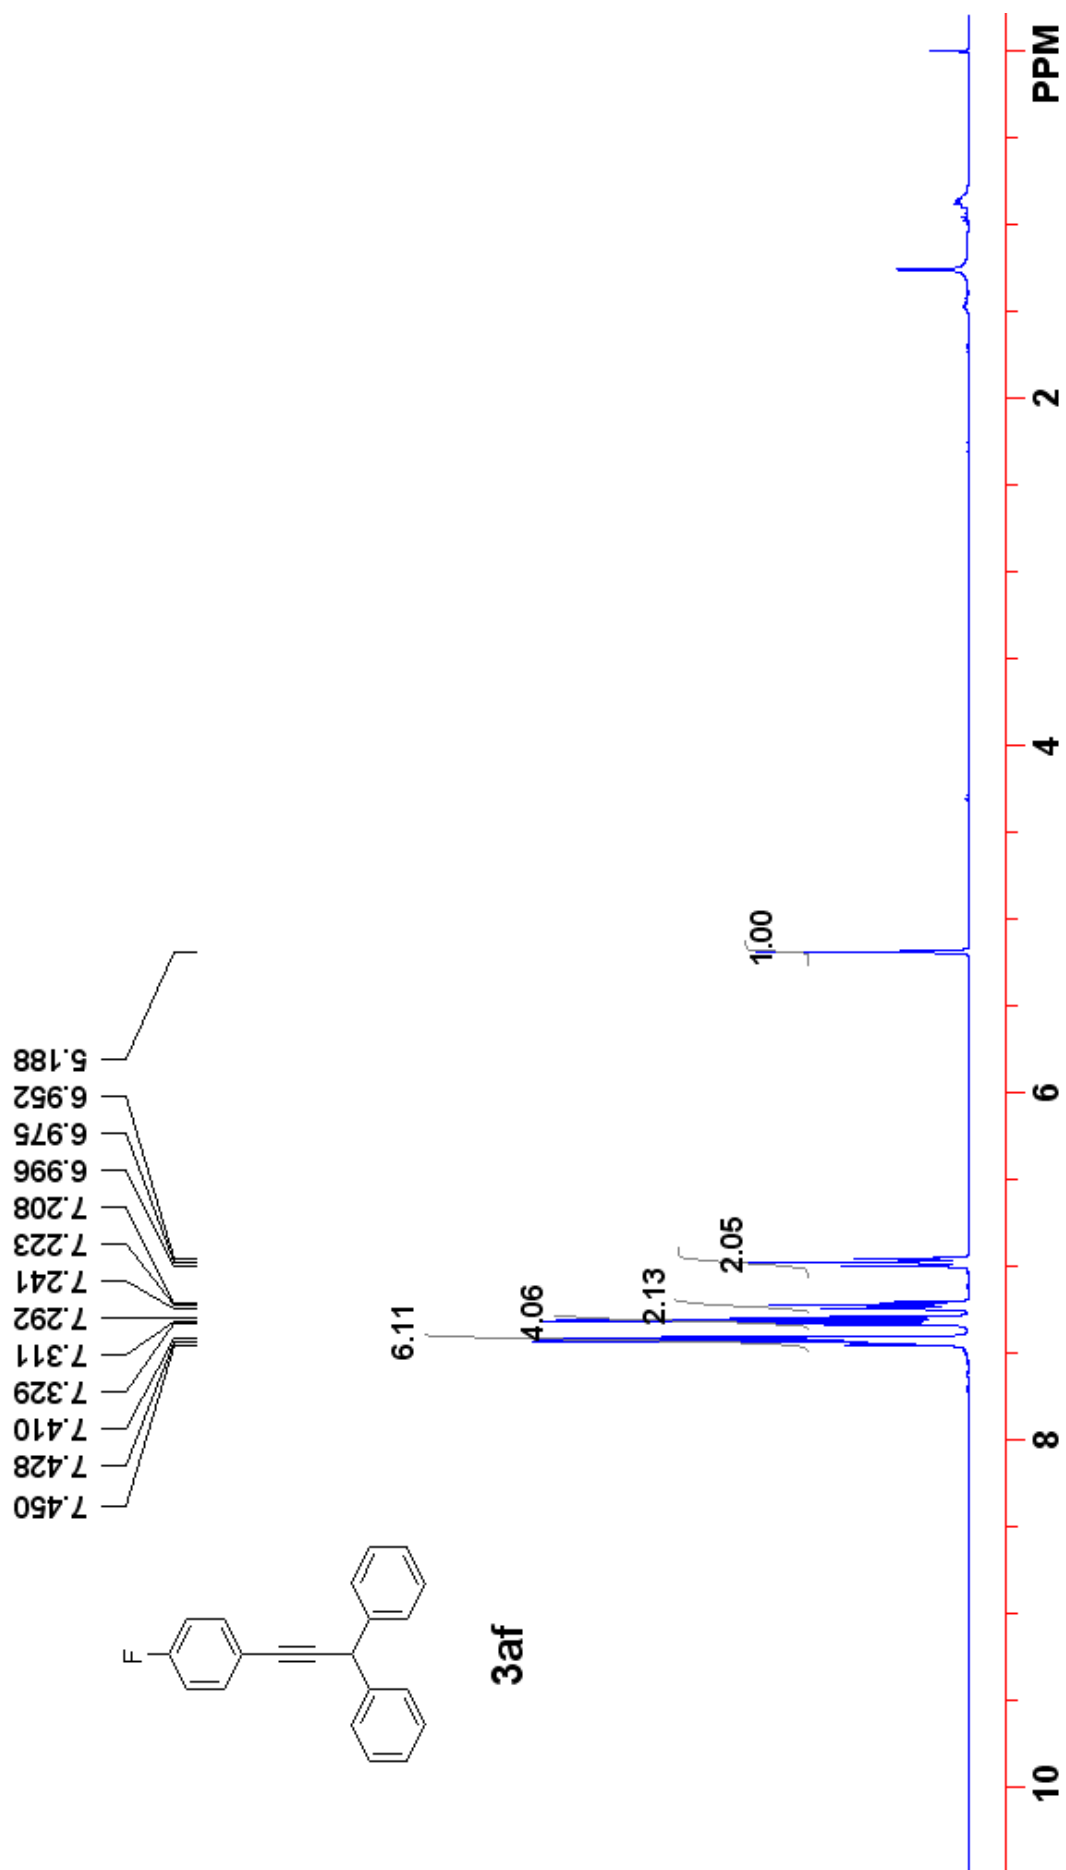



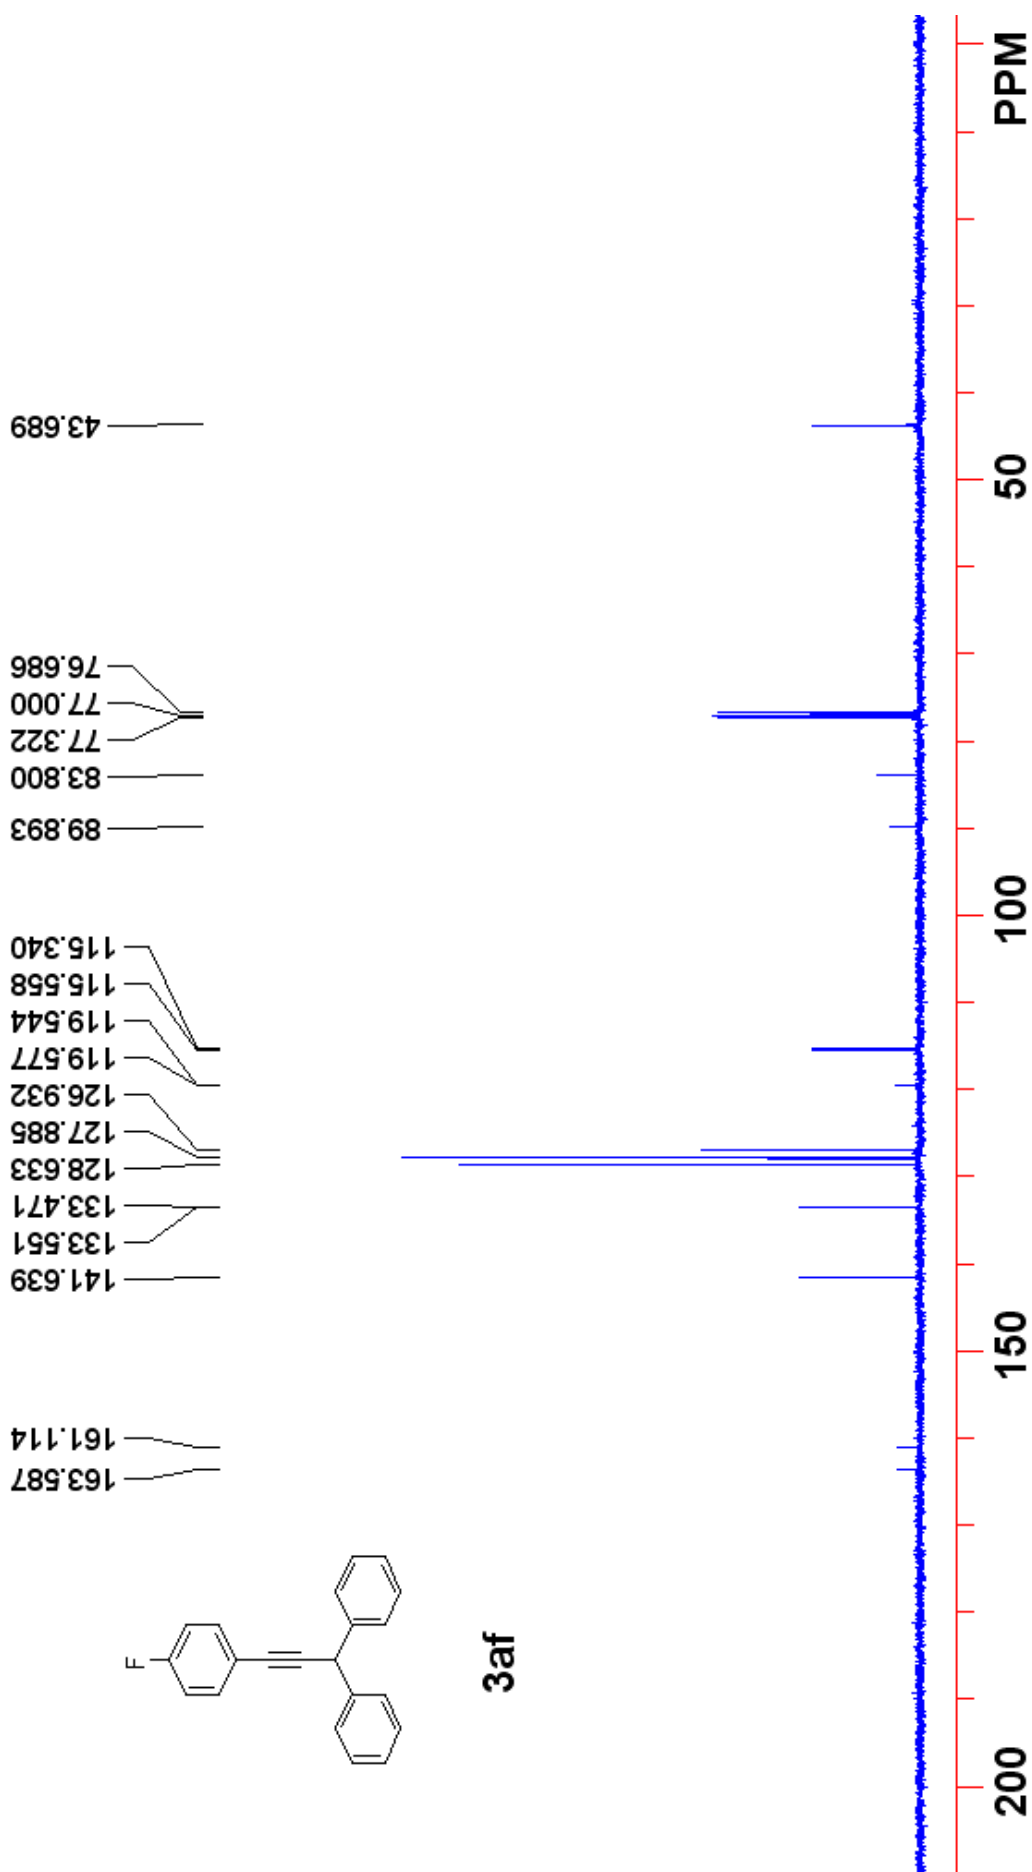

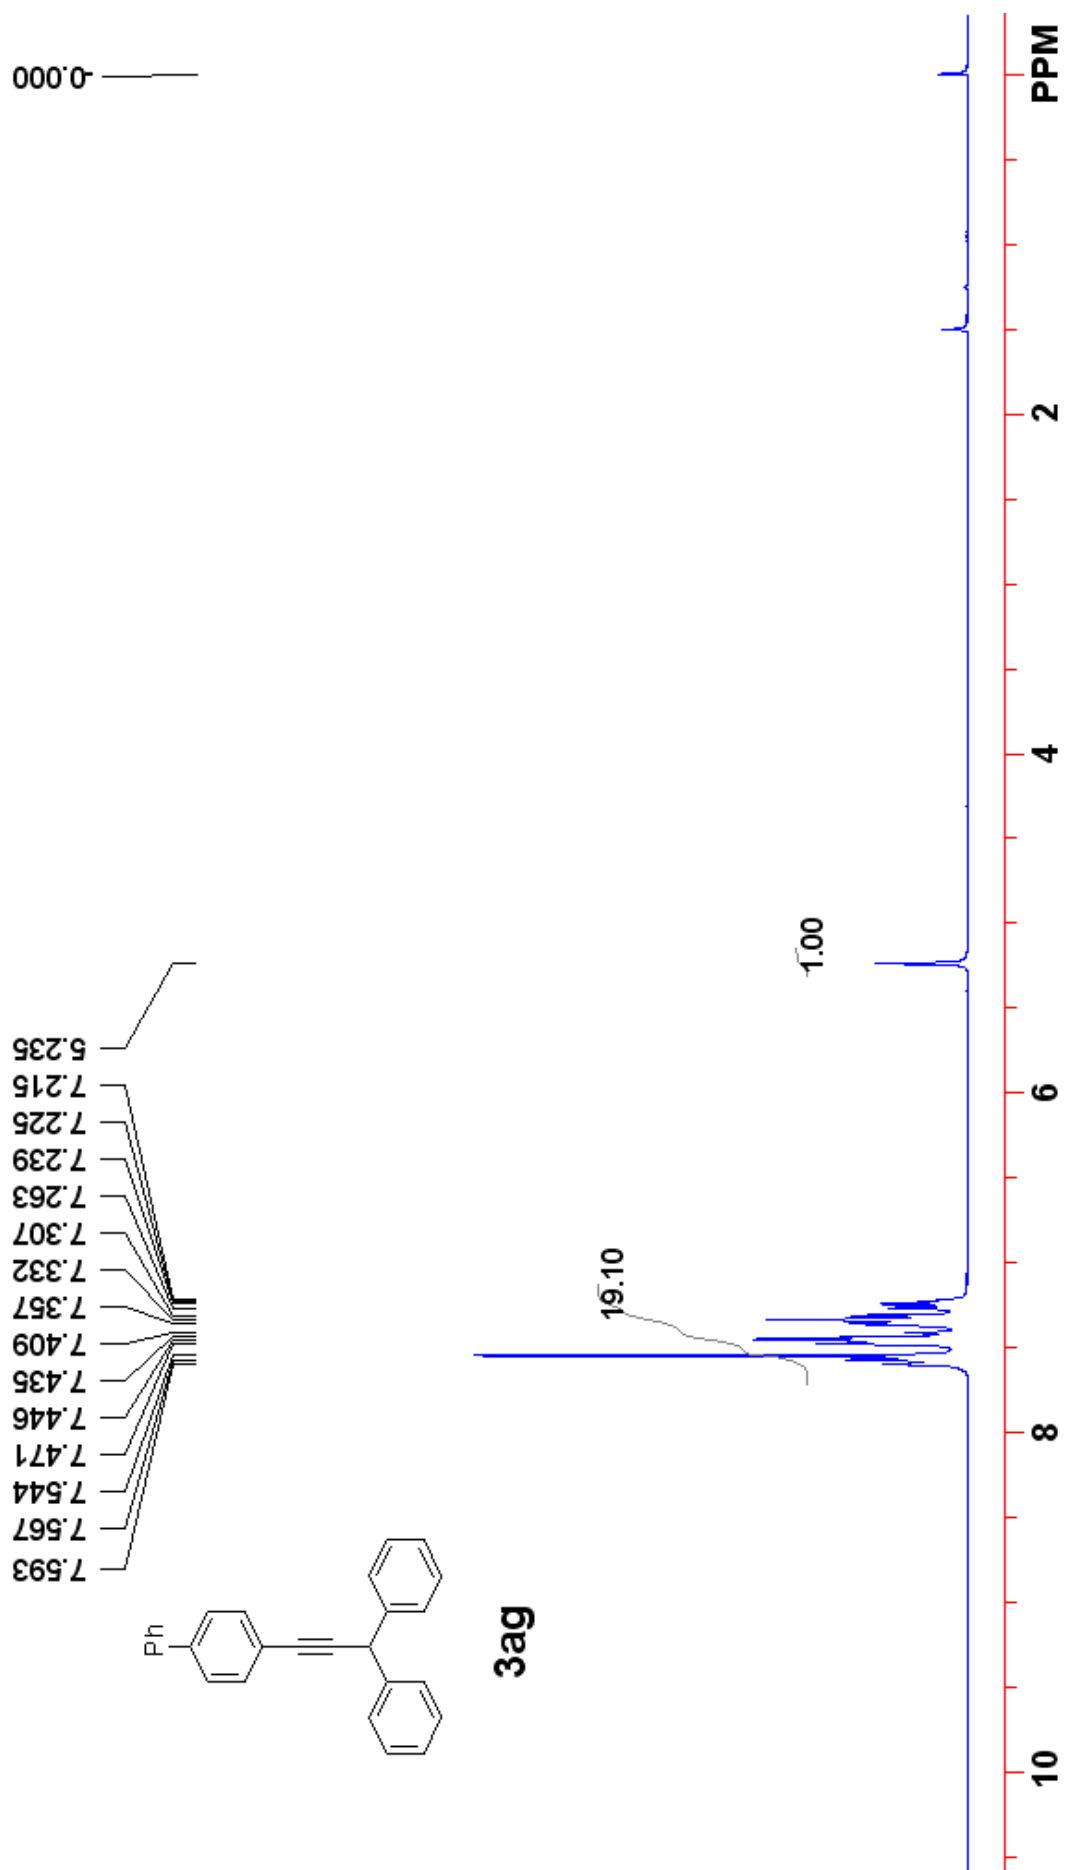

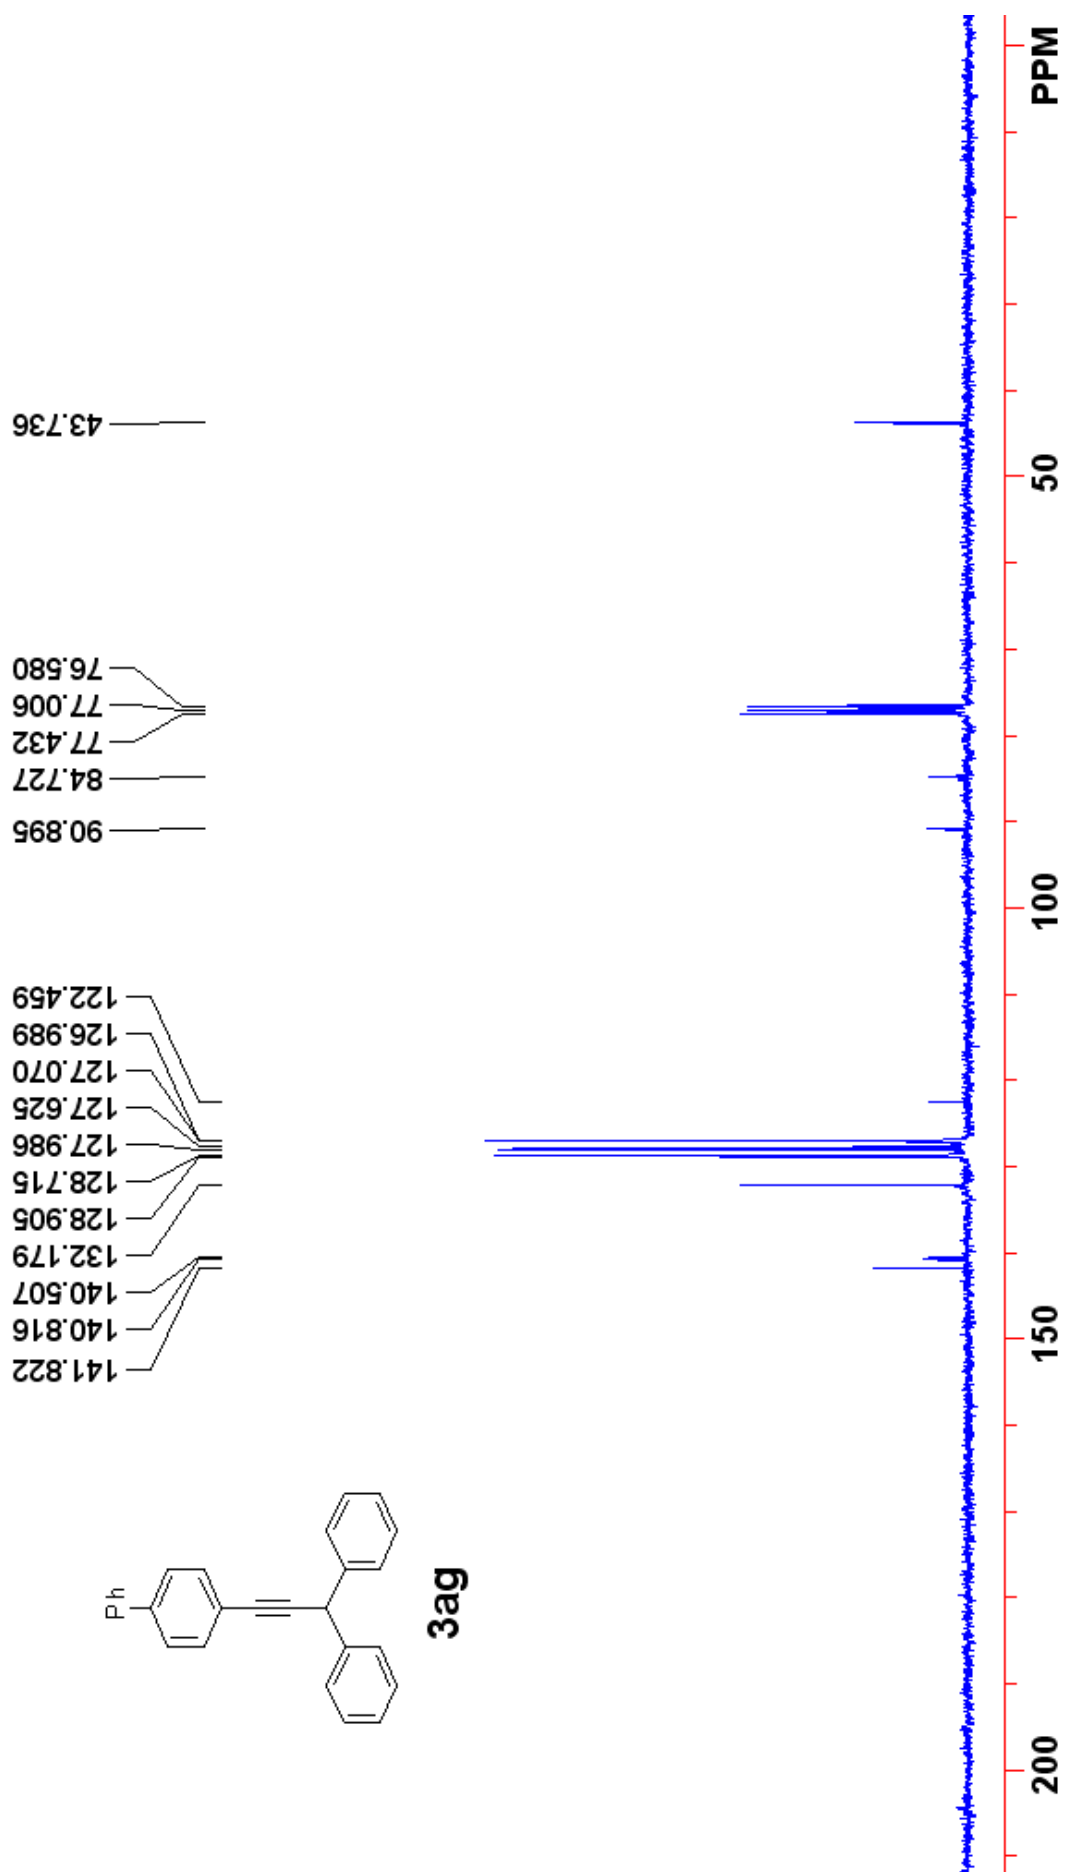

Supplement: b911905a.pdf [file b911905a.pdf]
